# Supplementary material for: Quantitative fibronectin to help decision-making in women with symptoms of preterm labour (QUIDS) part 1: Individual participant data meta-analysis and health economic analysis
Source: PubMed Central journal article supplement — BMJ Open. 2018 Apr 7;8(4):e020796. doi: 10.1136/bmjopen-2017-020796 (PMC5892771; doi:10.1136/bmjopen-2017-020796), 2018-04-07
Supplement: bmjopen-2017-020796.draft_revisions.pdf [file bmjopen-2017-020796.draft_revisions.pdf]

# BMJ Open

BMJ Open is committed to open peer review. As part of this commitment we make the peer review history of every article we publish publicly available.

When an article is published we post the peer reviewers' comments and the authors' responses online. We also post the versions of the paper that were used during peer review. These are the versions that the peer review comments apply to.

The versions of the paper that follow are the versions that were submitted during the peer review process. They are not the versions of record or the final published versions. They should not be cited or distributed as the published version of this manuscript.

BMJ Open is an open access journal and the full, final, typeset and author-corrected version of record of the manuscript is available on our site with no access controls, subscription charges or pay-per-view fees (<http://bmjopen.bmj.com>).

If you have any questions on BMJ Open's open peer review process please email [info.bmjopen@bmj.com](mailto:info.bmjopen@bmj.com)

# BMJ Open

## Study Protocol: Quantitative Fibronectin to help Decision-making in women with Symptoms of Preterm Labour (QUIDS) Part One- Individual Patient Data Meta-analysis and Health Economic Analysis

|                               |                                                                                                                                                                                                                                                                                                                                                                                                                                                                                                                                                                                                                                                                                                                                                                                                                                                                                                                                                                                                                                                                                                                                                                                                                                                                                                                                                                                                                                                                                                                                                                                                                                                                                                                                                                                                                                                                               |
|-------------------------------|-------------------------------------------------------------------------------------------------------------------------------------------------------------------------------------------------------------------------------------------------------------------------------------------------------------------------------------------------------------------------------------------------------------------------------------------------------------------------------------------------------------------------------------------------------------------------------------------------------------------------------------------------------------------------------------------------------------------------------------------------------------------------------------------------------------------------------------------------------------------------------------------------------------------------------------------------------------------------------------------------------------------------------------------------------------------------------------------------------------------------------------------------------------------------------------------------------------------------------------------------------------------------------------------------------------------------------------------------------------------------------------------------------------------------------------------------------------------------------------------------------------------------------------------------------------------------------------------------------------------------------------------------------------------------------------------------------------------------------------------------------------------------------------------------------------------------------------------------------------------------------|
| Journal:                      | <i>BMJ Open</i>                                                                                                                                                                                                                                                                                                                                                                                                                                                                                                                                                                                                                                                                                                                                                                                                                                                                                                                                                                                                                                                                                                                                                                                                                                                                                                                                                                                                                                                                                                                                                                                                                                                                                                                                                                                                                                                               |
| Manuscript ID                 | bmjopen-2017-020796                                                                                                                                                                                                                                                                                                                                                                                                                                                                                                                                                                                                                                                                                                                                                                                                                                                                                                                                                                                                                                                                                                                                                                                                                                                                                                                                                                                                                                                                                                                                                                                                                                                                                                                                                                                                                                                           |
| Article Type:                 | Protocol                                                                                                                                                                                                                                                                                                                                                                                                                                                                                                                                                                                                                                                                                                                                                                                                                                                                                                                                                                                                                                                                                                                                                                                                                                                                                                                                                                                                                                                                                                                                                                                                                                                                                                                                                                                                                                                                      |
| Date Submitted by the Author: | 23-Nov-2017                                                                                                                                                                                                                                                                                                                                                                                                                                                                                                                                                                                                                                                                                                                                                                                                                                                                                                                                                                                                                                                                                                                                                                                                                                                                                                                                                                                                                                                                                                                                                                                                                                                                                                                                                                                                                                                                   |
| Complete List of Authors:     | <p>Stock, Sarah; University of Edinburgh MRC Centre for Reproductive Health, Tommy's Centre for Maternal and Fetal Health; University of Western Australia School of Women's and Infant's Health,<br/>         Wotherspoon, Lisa; University of Edinburgh MRC Centre for Reproductive Health, Tommy's Centre for Maternal and Fetal Health<br/>         Boyd, Kathleen; University of Glasgow, Health Economics &amp; Health Technology Assessment<br/>         Morris, R. K.; University of Birmingham, Institute of Metabolism and Systems Research<br/>         Dorling, Jon; Queen's Medical Centre, Neonatal Unit<br/>         Jackson, Lesley; Royal Hospital for Children Glasgow, Neonatal Unit<br/>         Chandiramani, Manju; Imperial College Healthcare NHS Trust, Queen Charlotte and Chelsea Hospital, Du Cane Road, Shepherds Bush, London, W12 0HS<br/>         David, Anna; University College London Medical School, Institute for Womens Health<br/>         Khalil, Asma; St. George's Medical School, University of London<br/>         Shennan, Andrew; Kings College London, Maternal and Fetal Research Unit<br/>         Hodgetts Morton, Victoria ; Birmingham Women's Hospital, Metchley Park Road, Edgbaston, ,<br/>         Lavender, Tina; Manchester University<br/>         Khan, Khalid; Queen Mary, University of London, Centre for Primary Care and Public Health<br/>         Harper-Clarke, Susan; PPI Representative<br/>         Mol, Ben; University of Adelaide, The Robinson Institute, School of Paediatrics and Reproductive Health<br/>         Riley, Richard; Keele University<br/>         Norrie, John; Edinburgh Clinical Trials Unit, University of Edinburgh No. 9, Bioquarter<br/>         Norman, Jane; University of Edinburgh MRC Centre for Reproductive Health, Tommy's Centre for Maternal and Fetal Health</p> |
| Keywords:                     | Pregnancy, Preterm Birth, Fetal Fibronectin, Individual Patient Data Meta-analysis, HEALTH ECONOMICS                                                                                                                                                                                                                                                                                                                                                                                                                                                                                                                                                                                                                                                                                                                                                                                                                                                                                                                                                                                                                                                                                                                                                                                                                                                                                                                                                                                                                                                                                                                                                                                                                                                                                                                                                                          |
|                               |                                                                                                                                                                                                                                                                                                                                                                                                                                                                                                                                                                                                                                                                                                                                                                                                                                                                                                                                                                                                                                                                                                                                                                                                                                                                                                                                                                                                                                                                                                                                                                                                                                                                                                                                                                                                                                                                               |

1  
2  
3  
4  
5  
6  
7  
8  
9  
10  
11  
12  
13  
14  
15  
16  
17  
18  
19  
20  
21  
22  
23  
24  
25  
26  
27  
28  
29  
30  
31  
32  
33  
34  
35  
36  
37  
38  
39  
40  
41  
42  
43  
44  
45  
46  
47  
48  
49  
50  
51  
52  
53  
54  
55  
56  
57  
58  
59  
60

SCHOLARONE™  
Manuscripts

For peer review only

1  
2  
3 **Study Protocol: Quantitative Fibronectin to help Decision-making in women**  
4 **with Symptoms of Preterm Labour (QUIDS) Part One- Individual Patient Data**  
5 **Meta-analysis and Health Economic Analysis**  
6  
7

8 Sarah J Stock\*<sup>1,2</sup> Sarah.Stock@ed.ac.uk  
9  
10 Lisa Wotherspoon<sup>1</sup> Lisa.Wotherspoon@ed.ac.uk  
11  
12 Kathleen Boyd<sup>3</sup> Kathleen.Boyd@glasgow.ac.uk  
13  
14 Rachel K Morris<sup>4</sup> r.k.morris@bham.ac.uk  
15  
16 Jon Dorling<sup>5</sup> Jon.Dorling@nottingham.ac.uk  
17  
18 Lesley Jackson<sup>6</sup> Lesley.Jackson@ggc.scot.nhs.uk  
19  
20 Manju Chandiramani<sup>7</sup> m.chandiramani@imperial.ac.uk  
21  
22 Anna David<sup>8</sup> a.david@ucl.ac.uk  
23  
24 Asma Khalil<sup>9</sup> akhalil@sgul.ac.uk  
25  
26 Andrew Shennan<sup>10</sup> andrew.shennan@kcl.ac.uk  
27  
28 Victoria Hodgetts-Morton<sup>4</sup> v.a.h.morton@bham.ac.uk  
29  
30 Tina Lavender<sup>11</sup> Tina.Lavender@manchester.ac.uk  
31  
32 Khalid Khan<sup>12</sup> k.s.khan@qmul.ac.uk  
33  
34 Susan Harper-Clarke<sup>13</sup> su\_clarke@hotmail.com  
35  
36 Ben Mol<sup>14</sup> ben.mol@adelaide.edu.au  
37  
38 Richard D. Riley<sup>15</sup> r.riley@keele.ac.uk  
39  
40 John Norrie<sup>16</sup> J.Norrie@ed.ac.uk  
41  
42 Jane Norman<sup>1</sup> Jane.Norman@ed.ac.uk  
43

44 1. Tommy's Centre for Maternal and Fetal Health, University of Edinburgh MRC  
45 Centre for Reproductive Health, Queen's Medical Research Institute, Edinburgh, UK.  
46  
47 2. School of Women's and Infants' Health, University of Western Australia, Crawley  
48 WA 6009, AUS. 3. Institute of Health & Wellbeing Health Economics & Health  
49  
50 Technology Assessment, University of Glasgow, 1 Lilybank Gardens, Glasgow, UK.  
51  
52 4. School of Clinical and Experimental Medicine, University of Birmingham,  
53  
54 Birmingham, UK. 5. Queen's Medical Centre, Neonatal Unit, Derby Road,  
55  
56  
57  
58  
59

1  
2  
3 Nottingham, UK. 6. Royal Hospital for Children Glasgow, Neonatal Unit  
4 Glasgow, UK. 7. Imperial College Healthcare NHS Trust, Queen Charlotte and  
5 Chelsea Hospital, Du Cane Road, Shepherds Bush, London, UK. 8. University  
6 College London Medical School, Institute for Women's Health, 86-96 Chenies Mews,  
7 University College London Medical School London, UK. 9. St. George's Medical  
8 School, University of London, London, UK. 10. Kings College London, Maternal and  
9 Fetal Research Unit Maternal and Fetal Research Unit 10th Floor, North Wing  
10 London, UK. 11. University of Manchester School of Nursing, Midwifery & Social  
11 Work, Jean McFarlane Building, University Place, Oxford Road  
12 Manchester, UK. 12. Queen Mary, University of London, Centre for Primary Care and  
13 Public Health London, UK. 13. Patient and Public Involvement Representative. No  
14 affiliation. 14. University of Adelaide, The Robinson Institute, School of Paediatrics  
15 and Reproductive Health Adelaide, SA, AUS. 15. Research Institute for Primary Care  
16 and Health Sciences, Keele University, Keele, UK. 16. Edinburgh Clinical Trials Unit,  
17 University of Edinburgh No. 9, Bioquarter Edinburgh, UK.

18  
19  
20  
21  
22  
23  
24  
25  
26  
27  
28  
29  
30  
31  
32  
33  
34 \*Corresponding Author: Dr Sarah J Stock Senior Clinical Lecturer Maternal and Fetal  
35 Medicine, MRC Centre for Reproductive Health, Queen's Medical Research Institute,  
36 47 Little France Crescent, Edinburgh, EH16 4TJ. Tel: 0131 242 6449 Email:  
37 [sarah.stock@ed.ac.uk](mailto:sarah.stock@ed.ac.uk)

38  
39  
40  
41  
42  
43  
44 **Word Count:** 3,582

45  
46 **Key Words:** Pregnancy; Preterm Birth; Fetal Fibronectin; Health Economics;  
47 Individual Patient Data Meta-analysis.  
48  
49  
50  
51  
52  
53  
54  
55  
56  
57  
58  
59  
60

## ABSTRACT

**Introduction:** The aim of the QUIDS study is to develop a decision support tool for the management of women with symptoms and signs of preterm labour, based on a validated prognostic model using quantitative fetal Fibronectin (fFN) concentration, in combination with clinical risk factors.

**Methods and analysis:** The study will evaluate the Rapid fFN 10Q System (Hologic, Malborough, MA) which quantifies fFN in a vaginal swab. In part one of the study we will develop and internally validate a prognostic model using an individual participant data (IPD) meta-analysis of existing studies containing women with symptoms of preterm labour alongside fFN measurements and pregnancy outcome. An economic analysis will be undertaken to assess potential cost-effectiveness of the qfFN prognostic model. The primary endpoint will be the ability of the prognostic model to rule out spontaneous preterm birth within seven days. Six eligible studies were identified by systematic review of the literature and five agreed to provide their IPD (n= 5 studies, 1,783 women and 139 events of preterm delivery within 7 days of testing).

**Ethics and dissemination:** The study is funded by the National Institute of Healthcare Research Health Technology Assessment (HTA 14/32/01). It has been approved by the West of Scotland Research Ethics Committee (16/WS/0068).

**Registration details:** This IPD Meta-analysis is registered with PROSPERO (PROSPERO 2015:CRD42015027590).

**Version:** Protocol Version 2, Date 1<sup>st</sup> November 2016

## STRENGTHS AND LIMITATIONS OF THIS STUDY

### Strengths

- Development of prognostic model and for validation in a separate prospective cohort study

- 1  
2  
3 • Health Economic Analysis to determine cost effectiveness from NHS  
4 perspective  
5  
6  
7

8  
9 **Limitations**

- 10 • Not a randomized control trial to test effectiveness of the model on improved  
11 patient outcomes  
12  
13  
14  
15

16  
17 **HOW PATIENTS ARE INVOLVED IN THIS STUDY**

18 Patient representatives were consulted during the protocol development and  
19 have been invited to join the Project Management Group and the Trial Steering  
20 Committee. Prior to commencing QUIDS, we performed a qualitative study to  
21 determine the decisional needs of pregnant women with signs and symptoms of  
22 preterm labour, their partners and their caregivers. This is described in the  
23 separate protocol “QUIDS Qualitative” (Supplementary Material). The end  
24 product of QUIDS will be a decision support aid to help clinicians, women and  
25 their partners decide on management of threatened preterm labour, based on the  
26 results of the quantitative fFN. In QUIDS Qualitative women and clinicians  
27 indicated that they would prefer this to be on web based or mobile app based  
28 format, presenting the risk of preterm birth within seven days of testing.  
29  
30  
31  
32  
33  
34  
35  
36  
37  
38  
39  
40  
41  
42  
43  
44  
45  
46  
47  
48  
49  
50  
51  
52  
53  
54  
55  
56  
57  
58  
59  
60

## INTRODUCTION

The overall aim of the QUIDS study is to develop a decision support tool for the management of women with symptoms and signs of preterm labour, based on a validated prognostic model using quantitative fFN testing. The study has been conceptually divided into two parts. In this, the protocol for QUIDS Part One, we detail the protocol for development and internal validation of the prognostic model. In the protocol for QUIDS Part Two we detail the protocol for the prospective cohort for external validation of the prognostic model and acceptability testing.[1]

Preterm delivery (before 37 weeks) occurs in 7.1% of pregnancies in the UK (>50,000 deliveries per annum), with the majority the result of preterm labour.[2,3] It remains the leading cause of neonatal morbidity and mortality, but timely interventions, such as antenatal steroids to promote lung maturity, magnesium sulphate for neuroprotection, and delivery in a unit with appropriate neonatal care facilities can improve neonatal outcome. Establishing a diagnosis of preterm labour is, however, difficult. Clinical signs are non-specific and false positive diagnoses are common, with up to 80% of women with signs and symptoms of preterm labour remaining pregnant after seven days. [4, 5] Such diagnostic uncertainty means a large proportion of women with symptoms of preterm labour are treated unnecessarily to ensure benefits to the small proportion of babies that do actually deliver preterm.

It is understandable that both clinicians and pregnant women may prefer a 'treat-all' approach in women with symptoms of preterm labour, particularly in a setting remote from an appropriate neonatal unit; and in order to ensure steroid prophylaxis in case preterm delivery occurs. However, unnecessary interventions result in both a substantial economic burden to health services and in potential adverse maternal and neonatal events. Hospital admission and inter-hospital transfer have



1  
2  
3 considerable cost implications and can be associated with enormous problems for  
4 women and their families due to physical separation and emotional stress.[6,7]  
5 Neonatal cots become 'blocked' in order to accept a preterm baby just in case  
6 delivery occurs; negatively impacting the efficiency of already stretched neonatal  
7 units and networks. This frequently has knock-on effects to other women and babies,  
8 who may need transfer to another unit due to lack of cot availability despite an  
9 empty, but 'blocked', cot. It also may increase the number of *ex utero* transfers,  
10 which are associated with poorer outcomes than *in utero* transfers.[8] If preterm  
11 labour has been wrongly diagnosed, and delivery does not occur, steroids may also  
12 have adverse long-term consequences for the baby, especially if multiple courses  
13 are given.[9] Tocolytic therapy, even when appropriate can have serious side effects  
14 for both mother and baby.[10] Lastly, uncertainty of outcome may contribute to the  
15 high anxiety scores seen in women with threatened preterm labour and their  
16 partners.[11]

17  
18  
19 Diagnostic tests for preterm labour are available and used in many units in the UK.  
20 Fetal Fibronectin (fFN; Hologic, Marlborough, MA, USA) is a biochemical marker of  
21 preterm labour that can be measured in samples of cervicovaginal secretions  
22 collected at a speculum examination. It has potential to help improve diagnosis of  
23 impending preterm delivery.[12] Other biochemical tests which are available include  
24 Actim Partus (Medixbiochemica, Espoo, Finland) which measures phosphorylated  
25 insulin-like growth factor binding protein-1 (plIGFBP-1), and Partosure (Parsagen  
26 Diagnostics, Boston, MA, USA) which measures placental alpha microglobulin-1  
27 (PAMG-1). An alternative approach (which can be combined with fFN) is to measure  
28 the cervical length using transvaginal ultrasound, as the longer the cervix is, the less  
29 likely a preterm delivery.[12]

1  
2  
3 As part of an Health Technology Assessment (HTA) report Honest et al found that a  
4 qualitative fFN test (giving a positive or negative result based on a single threshold of  
5 50ng/ml) was potentially useful in the prediction of preterm delivery <34 weeks  
6 gestation, with its main benefit relating to its high negative predictive value i.e. its  
7 ability to rule out impending delivery.[12] A more recent HTA-funded review found  
8 that qualitative fFN testing has moderate accuracy for predicting preterm birth with  
9 overall sensitivity and specificity estimates of 76.7% and 82.7% for delivery within 7-  
10 10 days.[13] These estimates suggest that qualitative testing on its own would not  
11 have the sensitivity to rule out preterm delivery adequately, although in systematic  
12 review of clinical trials, no increase in neonatal morbidity or mortality was seen in  
13 association with false negative fFN results.[13] The authors concluded that this  
14 observation is likely to relate to the multifactorial nature of assessment of the risk of  
15 preterm delivery, where, in practice, fFN is just one component of the clinical  
16 assessment on which management decisions are based.[13]  
17  
18  
19  
20  
21  
22  
23  
24  
25  
26  
27  
28  
29  
30  
31

32 Both HTA reviews described above examined the performance of a qualitative fFN  
33 test, which provided a positive or negative result on the basis of a single threshold of  
34 50ng/ml. Recently, this test has been replaced in the UK with the Rapid fFN 10Q  
35 System, which provides a concentration of fFN within 10 minutes, and thus may be a  
36 more useful predictor of preterm delivery (quantitative fFN). We surveyed current  
37 practice in UK maternity units (response rate 66% [137/207]; Mar-July 2014).[14]  
38 135/137 units (98.5%) use some sort of diagnostic test of preterm labour. The most  
39 common test is fFN (84/137 units; 61.3%). fFN is now only available with a  
40 quantitative analyser in the UK, but there is no consensus as to which women to use  
41 the test in, or how to interpret the results. Developing and evaluating a decision  
42 support for qfFN is thus likely to improve decision making, even if qfFN is already  
43 available in clinical practice. Evidence about the potential value of the new  
44  
45  
46  
47  
48  
49  
50  
51  
52  
53  
54  
55  
56  
57  
58  
59  
60

1  
2  
3 quantitative fFN is required, along with guidance about how to interpret results. The  
4  
5 QUIDS study will address this evidence gap.  
6  
7

## 8 9 **METHODS AND ANALYSIS**

### 10 **Aims and Methodologies**

11  
12 The aim of the QUIDS study is to develop a decision support tool for the  
13  
14 management of women with symptoms and signs of preterm labour, based on a  
15  
16 validated prognostic model using quantitative fFN testing.  
17

18 The study protocol has been divided into two parts (see flow chart Figure 1). The  
19  
20 protocols for Parts One and Two are reported in separate manuscripts.  
21  
22

#### 23 24 Part 1: Development and Internal Validation of Prognostic Model

25  
26 i) Individual Participant Data (IPD) meta-analysis to develop a prognostic model  
27  
28 using quantitative fFN and other risk (prognostic) factors and to evaluate the added  
29  
30 value of quantitative fFN toward this prognostic model performance. A prognostic  
31  
32 model will be developed and internally validated[15,16] based on a meta-analysis of  
33  
34 IPD from existing prospective cohort studies where quantitative fFN results and  
35  
36 pregnancy outcome details are available. The primary outcome will be prediction will  
37  
38 be delivery within 7 days, although other endpoints will be included if recommended  
39  
40 by focus groups.  
41

42 (ii) Economic Analysis: To provide an economic rationale for the prognostic model  
43  
44 and analyze its cost-effectiveness from the perspective of the NHS to provide an  
45  
46 economic rationale for the prognostic model and the risk factors included in it.  
47  
48  
49

50 Part 2: Validation And Refinement Of Prognostic Model Involves a prospective cohort  
51  
52 study and acceptability testing, with external validation, (and, if necessary,  
53  
54 refinement) of the prognostic model, and update of health economic model.[1]  
55  
56  
57  
58  
59

## Endpoints

The primary endpoint is spontaneous preterm delivery within seven days of qfFN test, in women tested at less than 36 weeks gestation. This is both an important endpoint for women and caregivers (determined in QUIDS Qualitative study – a preceding qualitative study to identify the decisional needs of women, their partners and clinicians; Supplementary Material) as well as a clinically important endpoint. Antenatal steroids (which significantly reduce morbidity and mortality in preterm babies[17]) are most effective if delivery occurs within seven days of administration. As repeated doses of antenatal steroids may be harmful, it is crucial to ensure steroids are timed correctly.

A secondary endpoint suggested by the preceding QUIDS Qualitative Study consultation (Supplementary Material), was delivery within 48 hours of qfFN test. This analysis will be performed if feasible to do so within the constraints of the data available for model development.

## Health technologies being assessed

The study will evaluate the Rapid fFN 10Q System (Hologic), which provides a concentration of fFN (ng/ml or INVALID) in a vaginal swab sample. Further details about the system and recommended sampling technique are provided in the QUIDS Protocol Part Two. [1]

## Target population

The target population is pregnant women attending hospital with signs and symptoms of preterm labour.

## Development Of Prognostic Model

### Individual Patient Data Meta-Analysis

The proposed IPD-Meta-analysis was registered on PROSPERO (2015:CRD42015027590). Our IPD meta-analytical approach will follow existing guidelines, and our output will comply with the TRIPOD statement (Transparent reporting of a multivariable prediction model for individual prognosis or diagnosis statement).[18]

#### *Inclusion Criteria*

We prespecified inclusion of prospective cohort studies or RCTs of women with signs and symptom of preterm labour (as defined by investigators) that include quantitative fFN results determined by 10Q rapid fFN analyzer system and pregnancy outcome data; and the Principal Investigator of which has agreed to collaborate and provide data.

#### *Exclusion criteria*

We will exclude studies where fFN concentration was measured by ELISA and studies where IPD is not available for meta-analysis

#### *Search Strategy*

When applying for funding for this study (April 2014) we performed a literature search for completed and ongoing cohort studies of quantitative fFN using search terms for quantitative fetal/foetal fibronectin and preterm birth, including databases (MEDLINE, EMBASE, Cochrane Database of Systematic Reviews (CDSR), Database of Abstracts of Reviews of Effects (DARE) and Health Technology Assessment Database (HTA)) and clinical trial registries (Cochrane Central Register of Controlled Trials (CENTRAL), ClinicalTrials.Gov) general search engines (such as Google: <https://www.google.co.uk>) and systematic reviews. We also consulted preterm birth

1  
2  
3 researchers and networks (RCOG CSG; BMFMS, PREBIC) and the manufacturers  
4 of quantitative fFN, (Hologic) to help ensure capture of all relevant studies.  
5  
6  
7

8  
9 Study manuscripts and/or protocols were screened by two researchers. We identified  
10 a total of 10 studies of quantitative fFN that were potentially eligible. Four early  
11 datasets (in three manuscripts) used ELISA to determine the concentration of fFN  
12 and were excluded as the different method of analysis and earlier period of study  
13 would increase heterogeneity.[5,19,20] Therefore, six studies fulfilled the eligibility  
14 criteria (see Table 1).  
15  
16  
17  
18  
19

#### 20 21 22 *Establishment of the quantitative fFN IPD Collaboration*

23  
24 We contacted the principal investigators (PIs) of the six eligible studies of qfFN  
25 invited them to participate (see Table 1). Five of these agreed to provide their IPD as  
26 evidenced by their involvement as co-applicants on the funding application and/or co-  
27 authorship of this protocol (Mol, van Baaren, Khalil, Shennan, David). The PI of the  
28 6<sup>th</sup> study (Elovitz) indicated IPD may be available after publication of her study.  
29  
30  
31  
32  
33  
34  
35

36  
37 The five included studies (Table 1) are European studies of women with symptoms of  
38 preterm labour, comprising 1,783 women and 139 events of preterm delivery within 7  
39 days of testing. They are from consultant led maternity units in the UK (three studies)  
40 and Europe (two studies). All women in the included trials provided informed consent  
41 for participation in clinical trials, and for their IPD to be used in subsequent analyses.  
42  
43  
44  
45  
46  
47  
48  
49  
50  
51  
52  
53  
54  
55  
56  
57  
58  
59  
60

|                                                                                                                    | PI             | Setting                  | N            | Events     | Dates      | Inclusion                                                      | Primary Outcome                      |
|--------------------------------------------------------------------------------------------------------------------|----------------|--------------------------|--------------|------------|------------|----------------------------------------------------------------|--------------------------------------|
| <b>Studies with data available</b>                                                                                 |                |                          |              |            |            |                                                                |                                      |
| EQUIPP [21,22]                                                                                                     | Prof A Shennan | 5 UK centres             | 452          | 14         | 2010-2012  | 22-35 weeks with symptoms of preterm labour                    | Delivery <34 weeks gestation         |
| EUFIS* [23]                                                                                                        | Prof BW Mol    | 10 European Hospitals    | 452          | 48         | 2012-2014  | 24-34 weeks with preterm contractions and intact membranes     | Delivery within 7 days of test       |
| APOSTEL I* [24]                                                                                                    | van Baaren     | 10 Dutch Hospitals       | 528          | 70         | 2009 -2012 | 24-34 weeks with preterm contractions and intact membranes     | Days to delivery truncated at 7 days |
| QFCAPS (unpublished)                                                                                               | Dr A Khalil    | London teaching hospital | 86           | 2          | 2012-2014  | 24-34 weeks with symptoms of preterm labour<br>Singletons only | Delivery within 7 days of test       |
| UCLH/Whit (unpublished)                                                                                            | Dr A David     | 2 UK centres             | 262          | 5          | 2009-2010  | 22-35 weeks with symptoms of preterm labour                    | Delivery within 7 days of test       |
|                                                                                                                    | <b>TOTALS</b>  | <b>4 studies</b>         | <b>1,783</b> | <b>139</b> |            |                                                                |                                      |
| <b>Studies where data may be available in future</b>                                                               |                |                          |              |            |            |                                                                |                                      |
| STOP study ( <a href="http://clinicaltrials.gov/show/NCT01868308">http://clinicaltrials.gov/show/NCT01868308</a> ) | Prof M Elovitz | USA teaching hospital    | 700          | NK         | 2011-2015  | 22 -34 weeks<br>Symptomatic women with singleton pregnancy     | Delivery before 37 weeks             |

Table 1: Details of studies contributing data to IPD meta-analysis.

\*Study unpublished at time of search in April 2014; manuscript now published

## 1 *Study Quality Assessment and Data Collection*

2 IPD will be stored in a bespoke database on a secure server at the University of  
3 Edinburgh. PIs will be asked to provide de-identified data, and consider all recorded  
4 variables (even if not reported publications). We will assess study quality according  
5 to QUADAS-2[25] QUIPS[26] and CHARMS[27] guidelines.

## 6 7 *Sample Size Considerations*

8 The size of the IPD meta-analysis is limited by the number of studies with data  
9 available (Table 1). In model development the number of covariates that can be  
10 considered is limited by the number of events, with guidance suggesting at least ten  
11 events required for each covariate.[28,29] In our IPD meta-analysis data we have  
12 139 events (preterm labour within 7 days of testing) and therefore deemed that it was  
13 sensible to evaluate quantitative fFN and up to 13 other factors (covariates) for  
14 potential inclusion in our model.

## 15 16 *Data Items*

17 The following factors which are thought to influence risk of spontaneous preterm  
18 birth, will be requested and considered for inclusion as covariates in the prognostic  
19 model: quantitative fFN concentration, previous spontaneous preterm labour,  
20 gestation at fFN test, age, ethnicity, BMI, smoking, deprivation index, number of  
21 uterine contractions in set time period, cervical dilatation, vaginal bleeding, previous  
22 cervical treatment for cervical intraepithelial neoplasia, cervical length (measured by  
23 transvaginal cervical length), singleton/multiple pregnancy, tocolysis and fetal sex.  
24 Up to 13 of these will be prespecified for inclusion, based on available data (we will  
25 only use variables which are available in each study), and ranking for likely clinical  
26 relevance as agreed by consensus of the project management team.

## 27 28 *Data Cleaning*



1 Prior to analysis data will be checked for outliers and missing data will be identified.  
2  
3  
4 Descriptive statistics will be performed to summarise data. Problems identified will be  
5  
6 discussed with the PI of the original study, and amended as indicated by consensus  
7  
8 discussion.  
9

10 5

#### 11 6 *Data Analysis and Prognostic Model Development*

12  
13 7 Multivariable logistic regression modelling will be the primary method of analysis. The  
14  
15 8 primary endpoint for the prognostic model will be delivery within seven days. Another  
16  
17 9 endpoint found to be important in focus group consultations performed in QUIDS  
18  
19 10 Qualitative (Supplementary Material) included delivery within 48 hours, and we will  
20  
21 11 use this as a secondary endpoint if feasible (i.e. if sufficient number of cases with  
22  
23 12 delivery within 48 hours). We will develop an initial model with quantitative fFN  
24  
25 13 concentration, and then consider a model with other predefined clinical predictor  
26  
27 14 variables (see *Data Items*, above).  
28

29 15

30  
31 16 Tocolysis (which may delay onset of labour, although likely not beyond 48 hours) will  
32  
33 17 be included as a categorical variable (administered/not administered). We will  
34  
35 18 explore treatment effect by sensitivity analysis with and without the assumption that  
36  
37 19 tocolysis could delay delivery within 48 hours by a maximum odds ratio of 5.39, 95%  
38  
39 20 credible interval 2.14 to 12.34, based on data in Haas et al.[30].  
40

41 21

42  
43 22 As the outcome is binary, a logistic regression modelling framework will be used to  
44  
45 23 develop the model. A multi-level structure will be used to account for clustering of  
46  
47 24 patients within studies, and heterogeneity of the effects of included factors (hereafter  
48  
49 25 called 'predictors') will be accounted for using random-effects, with between-study  
50  
51 26 heterogeneity quantified using the estimated variance ('tau-squared') and the  $I^2$   
52  
53 27 statistic. A separate intercept term per study will be included in the model, to account  
54  
55 28 for the clustering and also gauge how predictions may require tailoring to different  
56  
57 29 populations. Predictors with large heterogeneity in the prognostic effect across  
58

1 studies may be removed to ensure summary Beta terms in the model are meaningful  
2 (accurate) for individual populations.[16]

3  
4 In the primary analysis, we will use data from the first recorded attendance with signs  
5 and symptoms of preterm labour to determine the relationship between that individual  
6 episode and outcome. Data from subsequent attendances will be analysed  
7 subsequently, and may be included in an appropriate model. As a parsimonious model  
8 is sought, to reduce the factors included in the model that may otherwise delay its  
9 use, we will use backward stepwise selection based on an information criterion (e.g.  
10 Akaike's information criterion  $p < 0.15$ ) to identify a parsimonious set of factors to be  
11 included in the model; hereafter these are referred to as included 'predictors'.  
12 Further, an approach of adding specialist tests, such as cervical length, only after  
13 considering simpler clinical assessment will be used, to maximise the utility of the  
14 model by ensuring that extra tests with their additional costs are only be included if  
15 they add to the predictive power.

16  
17 Linearity between continuous variables and outcome will be assessed using cubic  
18 spline plots and data will be transformed where appropriate before inclusion in  
19 multivariable analysis (e.g. using fractional polynomial methods). Missing data will be  
20 assessed to determine whether missing at random is appropriate, and if so, multiple  
21 imputation of observed participant characteristics will be used, with missing data  
22 imputed within each original study separately, before the meta-analysis. The results  
23 of these analyses will be compared with a complete case analysis.

#### 24 25 *Assessing Apparent Model Performance*

26 The apparent performance of the model will be assessed by its overall fit, and the  
27 observed discrimination and calibration in the IPD used to develop the model. Overall  
28 fit of the models will be expressed with Nagelkerke  $R^2$ . The ability of the models to  
29 discriminate between women with and without spontaneous preterm birth will be

1 determined by the area under the receiver operating characteristics curve (AUC),  
2 also known as the C statistic. Agreement between predicted and observed  
3 proportions of women with spontaneous preterm birth will be visualized using a  
4 calibration plot, and measured using calibration slope and calibration-in-the-large.

5

#### 6 *Internal validation: assessing Optimism In Model Performance*

7 Apparent performance is likely to be optimistic, as it is examined in the same data  
8 used for model development. Therefore internal validation will also be undertaken  
9 using a non-parametric bootstrap re-sampling technique in which each modelling  
10 step is repeated in each bootstrap sample, to obtain a new model in each bootstrap  
11 sample, and then its apparent performance (AUC and calibration slope) in the  
12 bootstrap sample is compared to its performance in the original dataset. The  
13 'optimism' is the mean difference (across all bootstrap samples) between the  
14 apparent value in the bootstrap sample and the observed value in the original  
15 dataset. This optimism estimate is then subtracted from the original model's apparent  
16 performance, to give an optimism-adjusted estimate of each measure of performance  
17 for the original model (e.g.  $R^2$ , C statistic, Calibration slope).

18

#### 19 *Production Of Final Model From IPD Meta-Analysis Via Uniform Shrinkage*

20 The optimism-adjusted calibration slope will be used as a uniform shrinkage factor, to  
21 adjust the parameter estimates (log odds ratios) of the original model. The beta  
22 coefficients in the original model will be multiplied by the shrinkage factor, and the  
23 study intercept terms re-estimated to ensure perfect overall calibration is maintained  
24 (across all studies and, ideally, in each study separately). This will thereby produce a  
25 final model containing the updated intercepts and the shrunken beta coefficients.[31]  
26 With multiple intercepts, a strategy (or strategies) will be developed amongst the  
27 study investigators for which intercept should be chosen for use when externally  
28 validating the model in a new population (e.g. choose intercept from study that most

1 closely resembles the population of application); each strategy will be evaluated and  
2 compared in the cohort study external validation phase.

3

#### 4 *Added Value Of Quantitative fFN*

5 The added value of quantitative fFN will be examined throughout the whole model  
6 process, in particular its improvement on discrimination, calibration and other  
7 meaningful factors (such as clinical decisions) using appropriate techniques (such as  
8 net reclassification improvement and decision analysis methods).

9

#### 10 *Subgroup analyses*

11 Subgroup analysis will be performed for multiple pregnancy, women with a previous  
12 preterm labour, gestation and those with criteria that are suggested to indicate  
13 preterm labour (number of uterine contractions in a set time period and/or cervical  
14 change). This will allow us to do a subgroup-analysis in which we assess whether the  
15 predictive capacity of quantitative fFN is similar in all subgroups.

16

#### 17 *Health Economic Analysis*

18 An early stage decision-analytic model will be built using evidence from current  
19 literature and from the IPD meta-analysis to explore the potential cost-effectiveness  
20 of different prognostic models including quantitative fFN.

21 A literature review will be undertaken to inform model design and identify additional  
22 model parameters with searches of Medline, Embase, Cochrane Library and the  
23 Paediatric Economic Database Evaluation for economic analyses including the use of  
24 fFN testing in woman with threatened preterm labour. Any evidence on resource use  
25 (test administration, treatments for preterm labour, hospital stay, hospital transfers,  
26 etc), quality of life and diagnostic outcome data from the IPD meta-analysis will be  
27 synthesized with the wider evidence based on current practice for women attending  
28 hospital with signs and symptoms of preterm labour. The economic analysis will be  
29 undertaken from the perspective of the UK NHS adhering to good practice guidelines

1 and the NICE reference case.[32] A decision tree will be developed to model the  
2 clinical pathway. The model will be used to explore potential cost effectiveness of  
3 the prognostic model at different thresholds on the Receiver Operator Curve,  
4 providing an economic rationale for the chosen prognostic model.  
5

## 6 **ETHICS AND DISSEMINATION**

### 7 **Trial Management And Oversight Arrangements**

#### 8 Project Management Group

9 The trial will be coordinated by a Project Management Group (PMG), consisting of  
10 the grant holders (Chief Investigator and Co-applicants), the trial manager,  
11 representatives from the Study Office and CHaRT (the supporting CTU), plus service  
12 user representatives (PAG). The PMG will meet approximately every four months by  
13 teleconference or face to face.  
14

#### 15 Trial Steering Committee and Data Monitoring Committee

16 A combined Trial Steering Committee and Data Monitoring Committee (TSC/DMC)  
17 will oversee the conduct and progress of the study. The terms of reference of the  
18 Committee will be developed separately. Members of the TSC/DMC will consist of  
19 experts and two patient representatives.  
20

#### 21 **Good Clinical Practice**

22 The study will be conducted in accordance with the principles of Good Clinical  
23 Practice (GCP). A favorable ethical opinion has been obtained from the appropriate  
24 REC (reference 16/WS/0068) and local R&D approval will be obtained prior to  
25 commencement of the study at each site.  
26

#### 27 **Dissemination**

28 On completion of the study, the study data will be analysed and tabulated, and a  
29 clinical study report will be prepared. Results will be communicated to the academic

1 community via the scientific literature, attendance at conferences and invited  
2 presentations. The TRIPOD reporting guidelines will be adhered to.[18] Summaries  
3 of results will also be made available to investigators for dissemination within clinics.  
4 Social media will be used to signpost publications and conference presentations and  
5 highlight important findings. Twitter and Facebook will be used to disseminate  
6 findings to professional organizations, charities, stakeholders and the public.  
7 Communication to the general public will further be facilitated by our close links with  
8 charities such as Tommy's [33].

#### 10 **PEER REVIEW**

11 The study was extensively peer reviewed as part of the process of gaining grant  
12 funding from the NIHR HTA (14/32/01).

#### 14 **FUNDING**

15 This project was funded by the National Institute of Healthcare Research Health  
16 Technology and Assessment (Reference 14/32/01). The views expressed are those  
17 of the authors and not necessarily those of the NHS, the NIHR or the Department of  
18 Health.

#### 20 **CONTRIBUTIONS TO AUTHORSHIP**

21 SJS, KB, RKM, JD, LJ, MC, AD, AK, AS, VHM, TL, KK, SHC, BM, RDR, JN and JEN  
22 developed the protocol. SJS, LW, RDR, KB, TL and JN drafted the protocol. RKM,  
23 JD, LJ, MC, AD, AK, AS, VHM, KK, SHC, BM and JEN reviewed and commented on  
24 the protocol.

#### 26 **COMPETING INTERESTS**

27 SJS and JEN work at the University of Edinburgh, who received £1000 sponsorship  
28 from Hologic to support a meeting (The Society of Reproductive Investigation and

1 MRC Centre for Reproductive Health Scientific Symposium on Targeting  
2 Inflammation to Improve Reproductive Health across the Lifecourse – August 2017).  
3 AS has in the past (over last five years; not in the last three years) received funding  
4 for expenses related to advisory board and internal staff education from Hologic.  
5 MC received sponsorship from Hologic to organise an educational teaching focusing  
6 on prediction of Preterm Birth at the 2017 annual meeting of the British Maternal and  
7 Fetal Medicine Society.  
8 Hologic, the makers of fFN have provided analysers and technical support for their  
9 use to sites participating in the QUIDS prospective cohort study. They have no  
10 access to the data, or other involvement in the conduct, analysis, interpretation or  
11 decision to publish the results of the study.

## 13 REFERENCES

- 14 1. Stock SJ, Wotherspoon L, Boyd K et al. Study Protocol: Quantitative Fibronectin to  
15 help Decision-making in women with Symptoms of Preterm Labour (QUIDS)  
16 Part Two- Prospective Cohort Study. *Submitted to BMJ Open alongside this*  
17 *manuscript(see supplementary information)*
- 18 2. Office for National Statistics (2013). ONS gestation-Specific Infant Mortality in  
19 England and Wales 2011. Cardiff ONS, 2013. Also available at:  
20 [https://www.ons.gov.uk/peoplepopulationandcommunity/healthandsocialcare/  
21 causesofdeath/bulletins/pregnancyandethnicfactorsinfluencingbirthsandinfant  
22 mortality/2013-10-10](https://www.ons.gov.uk/peoplepopulationandcommunity/healthandsocialcare/causesofdeath/bulletins/pregnancyandethnicfactorsinfluencingbirthsandinfantmortality/2013-10-10) (accessed 23<sup>rd</sup> November 2017).
- 23 3. Information Services Division (2013). "Births in Scottish hospitals 2012". Edinburgh  
24 National Services Scotland, 2013. Also available at:  
25 [http://www.isdscotland.org/Health-Topics/Maternity-and-  
26 Births/Publications/2013-08-27/2013-08-27-Births-Report.pdf?34511965514](http://www.isdscotland.org/Health-Topics/Maternity-and-Births/Publications/2013-08-27/2013-08-27-Births-Report.pdf?34511965514)  
27 (accessed 23<sup>rd</sup> November 2017).

- 1 4. Kenyon SL, Taylor DJ, Tarnow-Mordi W and Oracle Collaborative Group. Broad-  
2 spectrum antibiotics for spontaneous preterm labour: the ORACLE II  
3 randomised trial. ORACLE Collaborative Group. *Lancet* 2001;357(9261):989-  
4 94
- 5 5. Peaceman AM, Andrews WW, Thorp JM, et al. Fetal fibronectin as a predictor of  
6 preterm birth in patients with symptoms: a multicenter trial. *Am J Obstet*  
7 *Gynecol* 1997;177(1):13-8
- 8 6. Macintyre-Beon C, Skeoch C, Jackson L, Booth P, Cameron A. Scottish Perinatal  
9 Collaborative Transport Study. NHS Quality Improvement Scotland 2008
- 10 7. Wilson A, MacLean D, Skeoch C, Jackson L. An evaluation of the financial and  
11 emotional impact of in utero transfers upon families: a Scotland-wide audit.  
12 *Infant* 2010;6(2):38-40
- 13 8. Marlow N, Bennett C, Draper ES, Hennessy EM, Morgan AS, Costeloe KL.  
14 Perinatal outcomes for extremely preterm babies in relation to place of birth in  
15 England: the EPICure 2 study. *Arch Dis Child Fetal Neonatal Ed*  
16 2014;99(3):F181-8
- 17 9. Asztalos EV, Murphy KE, Willan AR, et al. Multiple Courses of Antenatal  
18 Corticosteroids for Preterm Birth Study: Outcomes in Children at 5 Years of  
19 Age (MACS-5). *JAMA Pediatr* 2013
- 20 10. de Heus R, Mol BW, Erwich JJ, et al. Adverse drug reactions to tocolytic  
21 treatment for preterm labour: prospective cohort study. *BMJ* 2009;338:b744
- 22 11. Yee WH, Sauve R. What information do parents want from the antenatal  
23 consultation? *Paediatr Child Health* 2007;12(3):191-6
- 24 12. Honest H, Forbes CA, Duree KH, et al. Screening to prevent spontaneous  
25 preterm birth: systematic reviews of accuracy and effectiveness literature with  
26 economic modelling. *Health Technol Assess* 2009;13(43):1-627
- 27 13. Deshpande SN, van Asselt AD, Tomini F, et al. Rapid fetal fibronectin testing to  
28 predict preterm birth in women with symptoms of premature labour: a



- 1  
2 1 systematic review and cost analysis. *Health Technol Assess* 2013;17(40):1-  
3  
4 2 138  
5  
6 3 14. Stock SJ, Morris RK, Chandiramani M et al. Variation in management of women  
7  
8 4 with threatened preterm labour. *Arch Dis Child Fetal Neonatal Ed*  
9  
10 5 2015;100(3):F276  
11  
12 6 15. Debray TP, Riley RD, Rovers MM, Reitsma JB, Moons KG, Cochrane IPDM-  
13  
14 7 aMg. Individual participant data (IPD) meta-analyses of diagnostic and  
15  
16 8 prognostic modeling studies: guidance on their use. *PLoS Med*  
17  
18 9 2015;12(10):e1001886  
19  
20 10 16. Debray TP, Moons KG, Ahmed I, Koffijberg H, Riley RD. A framework for  
21  
22 11 developing, implementing, and evaluating clinical prediction models in an  
23  
24 12 individual participant data meta-analysis. *Statistics in medicine*  
25  
26 13 2013;32(18):3158-80  
27  
28 14 17. Roberts D, Brown J, Medley N, Dalziel SR. Antenatal corticosteroids for  
29  
30 15 accelerating fetal lung maturation for women at risk of preterm birth.  
31  
32 16 *Cochrane Database Syst Rev* 2017;3:CD004454  
33  
34 17 18. Collins GS, Reitsma JB, Altman DG, Moons KG. Transparent reporting of a  
35  
36 18 multivariable prediction model for individual prognosis or diagnosis (TRIPOD):  
37  
38 19 the TRIPOD statement. *BMJ* 2015;350:g7594  
39  
40 20 19. Lu GC, Goldenberg RL, Cliver SP, Kreaden US, Andrews WW. Vaginal fetal  
41  
42 21 fibronectin levels and spontaneous preterm birth in symptomatic women.  
43  
44 22 *Obstet Gynecol* 2001;97(2):225-8  
45  
46 23 20. Gomez R, Romero R, Medina L, et al. Cervicovaginal fibronectin improves the  
47  
48 24 prediction of preterm delivery based on sonographic cervical length in patients  
49  
50 25 with preterm uterine contractions and intact membranes. *Am J Obstet*  
51  
52 26 *Gynecol* 2005;192(2):350-9  
53  
54 27 21. Abbott DH, NL. Seed, PT. Bennett, PR. Chandiramani, M. David, AL. Girling, J,  
55  
56 28 Norman, JE. Stock, SJ. Tribe, RM. Shennan, AH. EQUIPP: Evaluation of

- 1 Fetal Fibronectin with a novel bedside Quantitative Instrument for the  
2 Prediction of Preterm birth. Arch Dis Child Fetal Neonatal Ed 2014;99:A150-  
3 A51
- 4 22. Abbott DS, Radford SK, Seed PT, Tribe RM, Shennan AH. Evaluation of a  
5 quantitative fetal fibronectin test for spontaneous preterm birth in symptomatic  
6 women. Am J Obstet Gynecol 2013;208(2):122 e1-6
- 7 23. Bruijn MM, Kamphuis EI, Hoesli IM, et al. The predictive value of quantitative  
8 fibronectin testing in combination with cervical length measurement in  
9 symptomatic women. Am J Obstet Gynecol 2016;215(6):793 e1-93 e8
- 10 24. Bruijn M, Vis JY, Wilms FF, et al. Quantitative fetal fibronectin testing in  
11 combination with cervical length measurement in the prediction of  
12 spontaneous preterm delivery in symptomatic women. BJOG  
13 2016;123(12):1965-71
- 14 25. Whiting PF, Rutjes AW, Westwood ME, et al. QUADAS-2: a revised tool for the  
15 quality assessment of diagnostic accuracy studies. Ann Intern Med  
16 2011;155(8):529-36
- 17 26. Hayden JA, van der Windt DA, Cartwright JL, Cote P, Bombardier C. Assessing  
18 bias in studies of prognostic factors. Ann Intern Med 2013;158(4):280-6
- 19 27. Moons KG, de Groot JA, Bouwmeester W, et al. Critical appraisal and data  
20 extraction for systematic reviews of prediction modelling studies: the  
21 CHARMS checklist. PLoS Med 2014;11(10):e1001744
- 22 28. Vergouwe Y, Steyerberg EW, Eijkemans MJ, Habbema JD. Substantial effective  
23 sample sizes were required for external validation studies of predictive logistic  
24 regression models. J Clin Epidemiol 2005;58(5):475-83
- 25 29. Vittinghoff E, McCulloch CE. Relaxing the rule of ten events per variable in  
26 logistic and Cox regression. Am J Epidemiol 2007;165(6):710-8

- 1 30. Haas DM, Imperiale TF, Kirkpatrick PR, Klein RW, Zollinger TW, Golichowski  
2 AM. Tocolytic therapy: a meta-analysis and decision analysis. *Obstet Gynecol*  
3 2009;113(3):585-94  
4  
5 31. Steyerberg EW, Harrell FE, Jr., Borsboom GJ, Eijkemans MJ, Vergouwe Y,  
6 Habbema JD. Internal validation of predictive models: efficiency of some  
7 procedures for logistic regression analysis. *J Clin Epidemiol* 2001;54(8):774-  
8 81  
9  
10 32. National Institute for Clinical Excellence (NICE) Guide to the methods of  
11 technology appraisal 2013.  
12 <https://www.nice.org.uk/process/pmg9/chapter/the-reference-case> (accessed  
13 23<sup>rd</sup> November 2017).  
14  
15 33. <https://www.tommys.org> (accessed 23<sup>rd</sup> November 2017)  
16  
17  
18  
19  
20  
21  
22  
23  
24  
25  
26  
27  
28  
29  
30  
31  
32  
33  
34  
35  
36  
37  
38  
39  
40  
41  
42  
43  
44  
45  
46  
47  
48  
49  
50  
51  
52  
53  
54  
55  
56  
57  
58  
59  
60

Figure 1

QUIDS  
Part 1

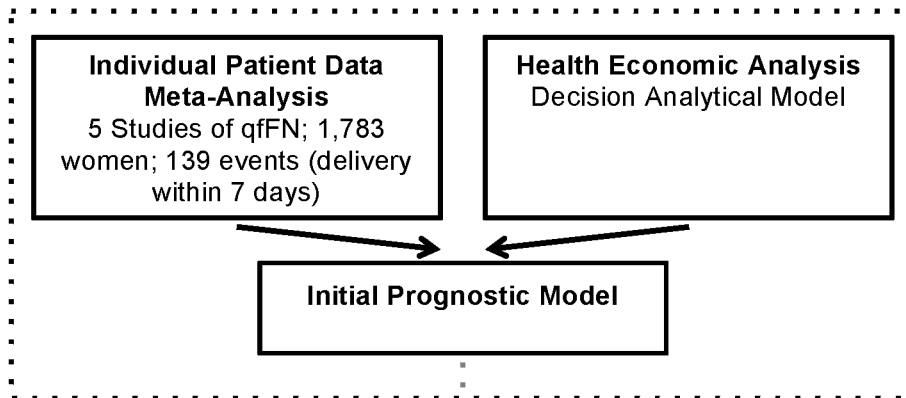

QUIDS  
Part 2  
[1]

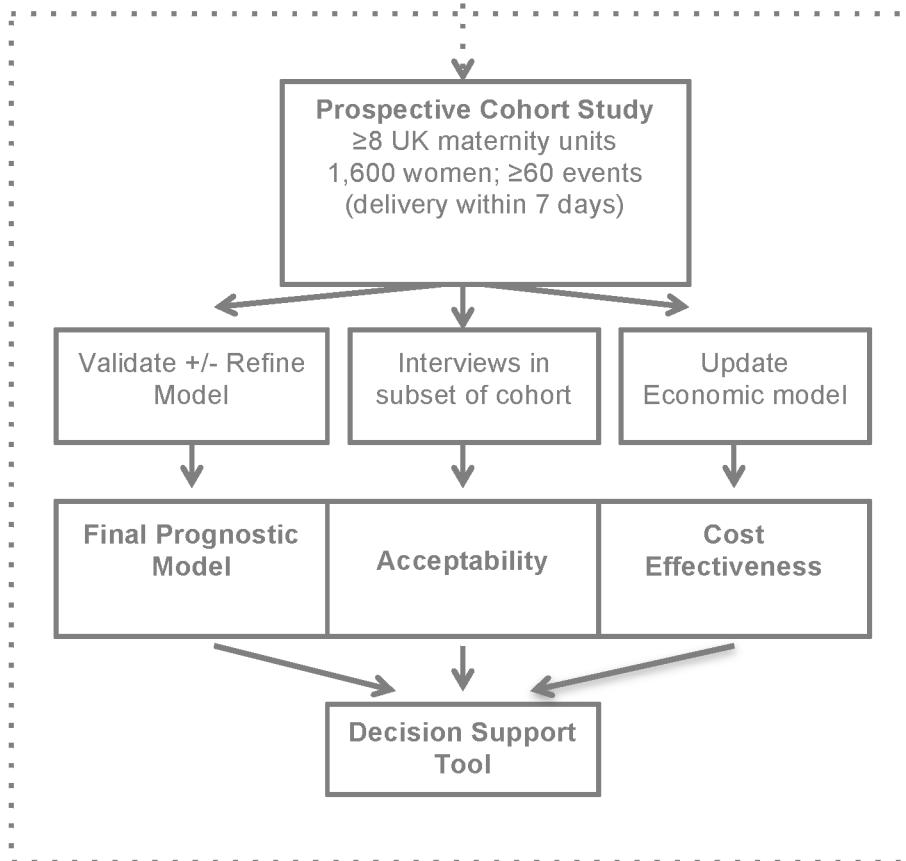

1  
2  
3  
4  
5  
6  
7  
8  
9  
10  
11  
12  
13  
14  
15  
16  
17  
18  
19  
20  
21  
22  
23  
24  
25  
26  
27  
28  
29  
30  
31  
32  
33  
34  
35  
36  
37  
38  
39  
40  
41  
42  
43  
44  
45  
46  
47  
48  
49  
50  
51  
52  
53  
54  
55  
56  
57  
58  
59  
60

**QUIDS Qualitative**

Quantitative Fibronectin to help Decision-making in women with Symptoms of Preterm Labour:  
determining decisional requirements

**Protocol**

(October 2015)

White H, O'Brien E, Hodgetts-Moreton V, Stock S, Lavender T

## Background

Preterm birth, defined as birth prior to 37 weeks gestation, occurs in 6-7% of pregnancies in Europe<sup>1</sup> and was recorded as 5.78% in England in 2013/14, equating to over 37,000 births.<sup>2</sup> Preterm birth is associated with a high risk of mortality, wide-ranging short- and long-term morbidities,<sup>3,4</sup> and significant economic costs to the NHS compared with birth at term.<sup>5</sup> Reducing the detrimental impact of preterm birth relies on the provision of timely and appropriate perinatal interventions. However, accurate prediction of preterm birth is challenging, even when the clinical symptoms are suggestive of preterm labour. In randomised trials approximately 80% of women diagnosed with preterm labour remained pregnant after 7 days.<sup>6,7</sup>

Interventions in preterm labour and preparations for preterm birth may include administration of corticosteroids to accelerate fetal lung maturation<sup>8,9</sup> and magnesium sulphate for fetal neuroprotection,<sup>10</sup> in utero transfer to a facility with appropriate maternity and neonatal services, and tocolysis to optimise time before birth to enable these.<sup>11</sup> Whilst such interventions can improve outcomes for mothers and babies who do experience preterm birth, they are not necessarily benign, especially for those in whom preterm birth does not occur.

The maximal beneficial impact of corticosteroids occurs with administration between 48 hours and seven days before birth, thus timing is especially important in optimising benefit for the neonate. For women who remain at risk of preterm birth after seven days of the initial dose, repeated doses reduce respiratory distress in the neonate<sup>9</sup> but have been found to be associated with a dose-dependent reduction in birthweight.<sup>12,13</sup> A five-year follow-up study of women who received repeated doses of antenatal corticosteroids due to risk of preterm birth found an increased risk of neurodevelopment impairment in infants born at term.<sup>14</sup> Therefore developing a strategy to establish the optimal time to give steroids is a research priority.

1  
2  
3 Magnesium sulphate administration immediately prior to birth has been shown to reduce cerebral  
4 palsy,<sup>10</sup> but there is a risk of magnesium toxicity leading to respiratory depression in the mother and,  
5 theoretically, the neonate.<sup>15</sup>  
6  
7

8  
9  
10 Whilst there is no clear beneficial effect of tocolytics on the incidence or outcome of preterm birth,<sup>16</sup>  
11 their use is recommended if the days gained prior to preterm birth can be used appropriately, for  
12 example transfer to a suitable maternity unit or the administration of drugs to protect the  
13 neonate.<sup>11</sup> Tocolysis is linked with various maternal and neonatal complications,<sup>17</sup> hence the need  
14 for therapy targeted only for those at risk of preterm birth and close monitoring of the mother and  
15 fetus throughout.  
16  
17

18 Often, inpatient admission is recommended if preterm labour is suspected. Previous literature has  
19 highlighted the social isolation and support needs that women with high-risk pregnancies who are  
20 hospitalised experience.<sup>18</sup> In some cases, in-utero transfer is indicated to ensure that birth takes  
21 place in a specialist unit with appropriate neonatal care facilities. This policy has been shown to  
22 reduce mortality<sup>19,20</sup> and morbidity<sup>21</sup> in preterm neonates, especially those born very premature.  
23 Qualitative research has indicated that women generally acknowledge the potential benefit of in  
24 utero transfer to their baby and, hence, are willing to endure the inconvenience and upheaval that it  
25 entails.<sup>22,23</sup> However, the experience is associated with an emotional, social and financial burden on  
26 women and their families, especially for the substantial proportion of women who do not deliver  
27 prematurely following in utero transfer. When describing their experiences of in utero transfer,  
28 women expressed shock at the prospect of the transfer, feeling socially isolated, and having no  
29 control over the situation, in addition to the practical difficulties experienced particularly by women  
30 who already had children.<sup>22,24,25</sup> In a large survey of women who had experienced in utero transfer,  
31 over a quarter lamented the financial cost<sup>24</sup> particularly with respect to their partner's outlay for  
32 travel, food, accommodation, and phone bills, exacerbated with requiring time off work.<sup>22</sup>  
33  
34

35 Furthermore, in utero transfer is costly to maternity services. Securing a maternal and neonatal bed  
36  
37  
38  
39  
40  
41  
42  
43  
44  
45  
46  
47  
48  
49  
50  
51  
52  
53  
54

1  
2  
3 in another unit is a time-consuming task that often falls to delivery suite midwives to arrange, whilst  
4 also continuing to provide care to the woman.<sup>26</sup> In a large observational study of all in utero  
5 transfers that took place in Scotland in a six-month period, nearly one third of all transfers were due  
6 to threatened preterm labour.<sup>27</sup> Under half of the women transferred from one consultant-led unit  
7 to another gave birth within 48 hours.<sup>27</sup> Such unnecessary transfers are costly to women, their  
8 families and maternity services. Qualitative research into women's experiences of preterm labour  
9 have highlighted the need for caregivers to create an environment where women are enabled to  
10 discuss their fears<sup>28</sup> and exert control over how they manage their preterm labour care.<sup>25</sup>  
11  
12  
13  
14  
15  
16  
17  
18  
19  
20  
21  
22

23 Accurate prediction of preterm birth could reduce the burdens and risks associated with  
24 unnecessary interventions, and enable women and their clinicians to make informed decisions  
25 regarding their care. Numerous diagnostic tests have been used in preterm labour, including  
26 biochemical tests of vaginal secretions and cervical length.<sup>29</sup> One such test is fetal fibronectin, a  
27 near-bedside test that provides a positive or negative result and has excellent negative predictive  
28 value.<sup>30</sup> Thus fetal fibronectin can identify which women will not benefit and may be put at risk by  
29 the interventions described previously, and reduce costs to maternity services.<sup>31</sup> Developments in  
30 fetal fibronectin testing have led to a quantitative test that provides a concentration of fetal  
31 fibronectin in vaginal secretions, giving women and clinicians more information on which to base  
32 their management decisions.<sup>32</sup>  
33  
34  
35  
36  
37  
38  
39  
40  
41  
42  
43  
44  
45  
46  
47

48 Qualitative evidence has indicated that women feel a sense of increased responsibility to their  
49 babies and themselves during a high risk pregnancy, such as threatened preterm labour.<sup>33</sup> Women  
50 want to be involved in decision making about their care to different degrees and feel most satisfied  
51 when their caregiver supports them to make decisions in the way they felt most comfortable.<sup>33</sup>  
52  
53  
54  
55  
56  
57



1  
2  
3 Previous literature on decision making and preterm birth has focussed on diagnostic tests<sup>6,28-32,34</sup> and  
4 the care of the preterm infant.<sup>35,36</sup> To date, there has been no investigation of what women, their  
5 partners and caregivers would like to know in order to make informed decisions about the care that  
6 is provided following the signs and symptoms of preterm labour.  
7  
8  
9

10  
11  
12  
13  
14  
15 Funding has been received from the National Institute for Health Research Health Technology  
16 Assessment Programme for a large, multicentre trial to develop a mobile application decision  
17 support tool for the management of women with symptoms and signs of preterm labour, based on a  
18 validated model using quantitative fetal fibronectin testing. This study is the precursor to that trial,  
19 with the aim of determining the decisional needs of pregnant women with the symptoms and signs  
20 of preterm labour, their families and caregivers, using a qualitative framework approach. The  
21 outcomes of this qualitative study will inform the development of the mobile application decision  
22 support tool, using the findings from an individual patient data meta-analysis. The tool will then be  
23 externally validated and refined in the multi-centre trial, QUIDS.  
24  
25  
26  
27  
28  
29  
30  
31  
32  
33  
34  
35  
36  
37  
38  
39  
40  
41  
42  
43  
44  
45  
46  
47  
48  
49  
50  
51  
52  
53  
54  
55  
56  
57  
58  
59  
60

## Methods

A qualitative framework approach will be used, based on data collected from focus groups and semi-structured telephone interviews.

## Setting

Focus groups will take place in three maternity units: Liverpool Women's NHS Foundation Trust, Birmingham Women's NHS Foundation Trust and Royal Edinburgh Hospital, NHS Lothian. There will be focus groups for women and a separate focus group for partners. Clinicians who care for women with threatened preterm birth will be interviewed by telephone.

## Sample

A purposive sample of women and partners will be recruited to cover a variety of experiences of preterm labour and birth. Women will be stratified by their prior experience and relevant characteristics, including ethnicity, previous obstetric history, living in an urban or rural setting and proximity to a tertiary neonatal referral centre. Two focus groups of 4–8 women will be conducted at each site; one for pregnant women who are at high risk of preterm birth, and one for postnatal women who have recently experienced preterm birth. One partners' focus group will be conducted at one of the sites. If women or partners are unable to attend a focus group but still wish to participate, a semi-structured telephone interview will be offered.

Up to 10 obstetricians, including trainees, midwives, and neonatologists will be purposefully recruited to cover a range of professional backgrounds and experience. Semi-structured telephone interviews will be used to collect the data.

## Eligibility

### *Principal inclusion criteria for women's antenatal focus groups*

Women who are currently pregnant who:

- Have previously experienced preterm birth following preterm labour,
- Have experienced threatened preterm labour in this pregnancy,
- Are at high risk of preterm birth for another clinical reason, such as prior cervical surgery.

### *Principal inclusion criteria for women's postnatal focus groups*

Women who have experienced preterm birth following preterm labour at <34 weeks whose babies **are stable and well** and are receiving care on the special care baby unit or neonatal intensive care unit.

### *Principal inclusion criteria for partners' focus groups*

Partners of women who fit the eligibility criteria for either focus group.

### *Principal exclusion criteria for the focus groups*

Non-English speaking individuals.

### *Principal inclusion criteria for clinician interviews*

Clinicians who care for pregnant women i.e. obstetricians (including trainees), neonatologists and midwives.

### *Principal exclusion criteria for clinician interviews*

1  
2  
3 Researchers in QUIDS or QUIDS qualitative.  
4  
5  
6  
7

## 8 **Recruitment**

### 9 *Women and partners*

10  
11  
12  
13  
14 Eligible women will be identified by clinicians in the preterm birth clinic and other antenatal clinics,  
15  
16 and antenatal, triage or labour wards (for the antenatal focus groups) and the special care baby unit  
17  
18 or postnatal clinics (for the postnatal focus groups) at each site. Eligible partners will be identified by  
19  
20 the same method. Clinicians who are aware of and understand the research aims will approach  
21  
22 women and partners to request consent for a researcher to contact them. Importantly, only  
23  
24 postnatal parents whose babies are being cared for on the SCBU who are considered stable and well  
25  
26 by the clinicians will be approached. With consent the researcher will make contact to talk to the  
27  
28 women and/or their partners about the research, either face-to-face or over the telephone.  
29  
30 Potential participants will be given the participant information sheet (PIS) (appendix \_) that is  
31  
32 relevant to them and given verbal information about the study. Each participant will be given time to  
33  
34 read the information and the opportunity to have any questions answered. Willing participants will  
35  
36 be asked to provide their written consent prior to the focus groups.  
37  
38  
39  
40  
41  
42

### 43 *Clinicians*

44  
45  
46 Eligible clinicians will be approached by the researchers, via email or face-to-face. Clinicians will be  
47  
48 given the clinician PIS (appendix \_) and the opportunity to read the information and have any  
49  
50 questions answered. Willing clinicians will be asked to provide their written consent prior to the  
51  
52 interviews.  
53  
54  
55  
56  
57

1  
2  
3 All participants (women, partners and clinicians) will be reassured that they are not compelled to  
4 participate, that they can withdraw from the study at any time, and that non-participation will not  
5 affect their care or employment in any way.  
6  
7  
8  
9  
10

### 11 12 **Data collection**

13  
14  
15 The primary aim of this research is to determine the decisional requirements of women, their  
16 partners and clinicians for the management of preterm labour. Qualitative semi-structured  
17 interviews, in a focus-group setting or individual telephone interviews, provide a means of collecting  
18 rich, in-depth data with a specific focus.<sup>37</sup> Hence, structured topic guides will be used to initiate and  
19 concentrate the discussion (appendices 7–10).  
20  
21  
22  
23  
24  
25

26  
27 Focus groups are the preferred format for eliciting the view of women and women's partners.  
28 Encouraging discussion among a homogenous group with a shared interest is likely to provide rich  
29 insight and understanding into the group's experiences, beliefs and norms as a result of their social  
30 interaction.<sup>38</sup> Conversely, interviewing clinicians individually avoids the potential pitfall of  
31 professional embarrassment stifling ideas in a group setting. Interviewing individual clinicians with a  
32 range of professional experience should ensure that the decisional requirements of clinicians at all  
33 levels of experience are understood.  
34  
35  
36  
37  
38  
39  
40  
41  
42  
43  
44

45 Demographic details and baseline characteristics will be collected prior to the interviews, either as a  
46 self-completion questionnaire, or questions asked by the researcher over the telephone. All  
47 interviews will be audio recorded, with the participants' consent, and field notes taken. The focus  
48 groups will be facilitated by at least two researchers. This is to ensure that all pre-specified areas of  
49 interest are covered and that non-verbal communication and group interactions are documented  
50 within the field-notes, which will provide context for the data analysis. Recapping will be used to  
51  
52  
53  
54  
55  
56  
57

58 V 1.3  
59 21/10/15  
60

clarify aspects and avoid misinterpretation. To enable all participants to talk freely, the researchers will be unknown to the participants and not working clinically in the unit where the interview is conducted. Clinicians will be interviewed by a researcher who is unknown to them.

|                                  | Site       | Interviewers |
|----------------------------------|------------|--------------|
| Women and partners' focus groups | Liverpool  | HW and EO    |
|                                  | Birmingham | HW and VH-M  |
|                                  | Edinburgh  | HW and LM    |
| Clinician interviews             | Telephone  | HW (and EO?) |

### Analysis plan

A framework approach to data analysis will be used. This approach was developed to manage and interpret large volumes of data collected to inform health policy, meaning they had focussed aims and objectives.<sup>37</sup> Likewise, this research has clear aims, as described previously, in addition to the methodological aim of collecting rich data about the experiences and beliefs of women, their partners and clinicians in relation to managing preterm labour.

Framework analysis follows specific, clearly documented stages of analysis that are transparent so that others can review the interpretation processes and understand how the findings were reached.<sup>39</sup> Transparency is particularly important in this study as the findings will inform the development of an application to aid management decisions in clinical practice. Following verbatim transcription of the interview recordings, the researchers will become familiar with the data by reading the transcripts and field-notes several times. The next stage is to develop a theoretical framework by re-reading the transcripts and making notes as recurring characteristics are

V 1.3  
21/10/15

1  
2  
3 recognised. The characteristics will then be collated into themes, which are based on the text itself,  
4  
5 supported by the field-notes. The resulting thematic framework will be applied back to the  
6  
7 transcripts and field-notes to check that it reflects the context of the original data. The transcripts  
8  
9 will be coded, so that portions of text are linked to a discrete theme. A sample of transcripts will be  
10  
11 independently coded by two people. The data will be charted and indexed to identify the preterm  
12  
13 labour or professional experience of the participant, thus enabling the attribution of themes to a  
14  
15 particular group. Finally, the content of the charts will be interpreted and mapped against each  
16  
17 other to devise themes and sub-themes categories. Once again, this will involve review of the  
18  
19 original data. Explanatory accounts will be developed to clarify the data and quotable sections of  
20  
21 data will be identified. The final categories will be discussed between the researchers until  
22  
23 consensus is met. The researchers will maintain reflexive journals throughout the data collection and  
24  
25 analysis stages, recognising and ameliorating, as far as possible, the fact that their presence and  
26  
27 assumptions impact on the data and the findings.<sup>40</sup>

28  
29  
30  
31 This method of data analysis creates a clear audit trail thus ensuring rigour. Each stage of analysis  
32  
33 refers back to the original data so that context and meaning is not lost in the final framework of  
34  
35 themes and subthemes. The data analysis process will be managed using NVivo software, a  
36  
37 qualitative data analysis tool.  
38  
39  
40  
41  
42

### 43 **Participant withdrawal**

44  
45  
46 Participants may withdraw from the study at any point. However, they will not be able to withdraw  
47  
48 use of their data once the prognostic tool is developed.  
49  
50  
51  
52  
53  
54  
55  
56  
57

## Safety

The physical safety of participants will be ensured through adhering to the health and safety policies of the host units where the focus groups take place.

The emotional wellbeing of the participants will be safeguarded by following the Distress Policy (see appendix 11). The Supervisors of Midwives (SOM) team in each unit will be informed of the study and women and their partners will be given the SOM team contact details, should they become distressed or upset as a result of talking about their experiences. Participants will also be given the contact details for accessing local counselling services.

## Good clinical practice

### *Informed consent*

All participants will be fully informed about the study and the subsequent QUIDS trial via verbal and written communication. All eligible individuals will be given the participant information sheet (appendix \_\_) and provided with an opportunity to have any questions answered. Written consent will then be gained prior to the commencement of the focus groups/interviews.

### *Confidentiality*

Demographic information will be collected from participants to attribute themes from the data to particular groups within the analysis and dissemination of findings. Demographic information, which will contain potentially identifiable information, will be kept in a secure lockable cabinet. Audio recordings will be stored on an encryptable audio device only until they are transcribed. Once transcribed the audio recordings will be deleted. Transcription services are provided by '1<sup>st</sup> Class Secretarial', who subscribe to the Data Protection Act and have also signed the Code of Practice on Data Handling. Hard copies of audio transcripts and field-notes will be kept in a separate secure



1  
2  
3 lockable cabinet to the demographic information. The transcripts and field-notes will be coded to  
4  
5 identify which participant provided that data; the codes will only be known by the researchers.  
6  
7 Participant's data will not be used for any purpose other than this study and the subsequent QUIDS  
8  
9 trial.

### 10 11 12 *Data Protection*

13  
14  
15 Participants will be informed that publications from this study will contain direct quotes from the  
16  
17 focus groups/interviews and categorisation of their experience of preterm labour (e.g. experienced  
18  
19 preterm birth), which could enable personal identification.

20  
21  
22 All researchers involved in this study must comply with the requirements of the Data Protection Act  
23  
24 1998 with regard to the collection, storage, processing and disclosure of personal information and  
25  
26 uphold the Act's core principles. All computers used for processing data are password protected and  
27  
28 subject to the strict data protection policies of the researcher's institution.

### 29 30 31 *Good clinical practice training*

32  
33  
34 All researchers involved in this study must hold evidence of recent Good Clinical Practice training.  
35  
36  
37  
38  
39

### 40 **Additional ethical considerations**

#### 41 42 *Expenses and reimbursement*

43  
44  
45 Participants will be reimbursed for all out of pocket expenses, for example travelling to the interview  
46  
47 site. Participants will be informed of this and how to apply for expenses reimbursement, including  
48  
49 keeping receipts for travel.  
50  
51  
52  
53  
54  
55  
56  
57

### *Safety of researchers*

An individualised risk assessment will be conducted to identify any risks to researchers or participants involved in this study. The lone working policy of the institution will be adhered to at all times. The only anticipated lone working will be during travel to and from the interview sites.

The lone working policy of the researcher's institutions mandates that researchers wear a GPS tracking and audio transmitting device during all lone-working, off-site research activity with participants. Participants will be informed if this device is being used.

### **Insurance / Indemnity**

The researcher's institution holds public liability insurance and professional indemnity insurance (appendices 12, 13 and 14).

### **Timeline**

The anticipated start date for the focus groups and interviews is 1<sup>st</sup> January 2016, to be completed within 3 months.

1  
2  
3 **Appendices**  
4

5  
6 **Appendix 1: PIS women**  
7

8  
9 **Appendix 2: PIS partners**  
10

11  
12 **Appendix 3: PIS clinicians**  
13

14  
15 **Appendix 4: Consent form women**  
16

17  
18 **Appendix 5: consent form partners**  
19

20  
21 **Appendix 6: consent form clinicians**  
22

23  
24 **Appendix 7: Interview schedule AN women**  
25

26  
27 **Appendix 8: Interview schedule PN women**  
28

29  
30 **Appendix 9: Interview schedule partners**  
31

32  
33 **Appendix 10: Interview schedule clinicians**  
34  
35  
36  
37  
38  
39  
40  
41  
42  
43  
44  
45  
46  
47  
48  
49  
50  
51  
52  
53  
54  
55  
56  
57  
58  
59  
60

For peer review only

## Appendix 11: Distress policy

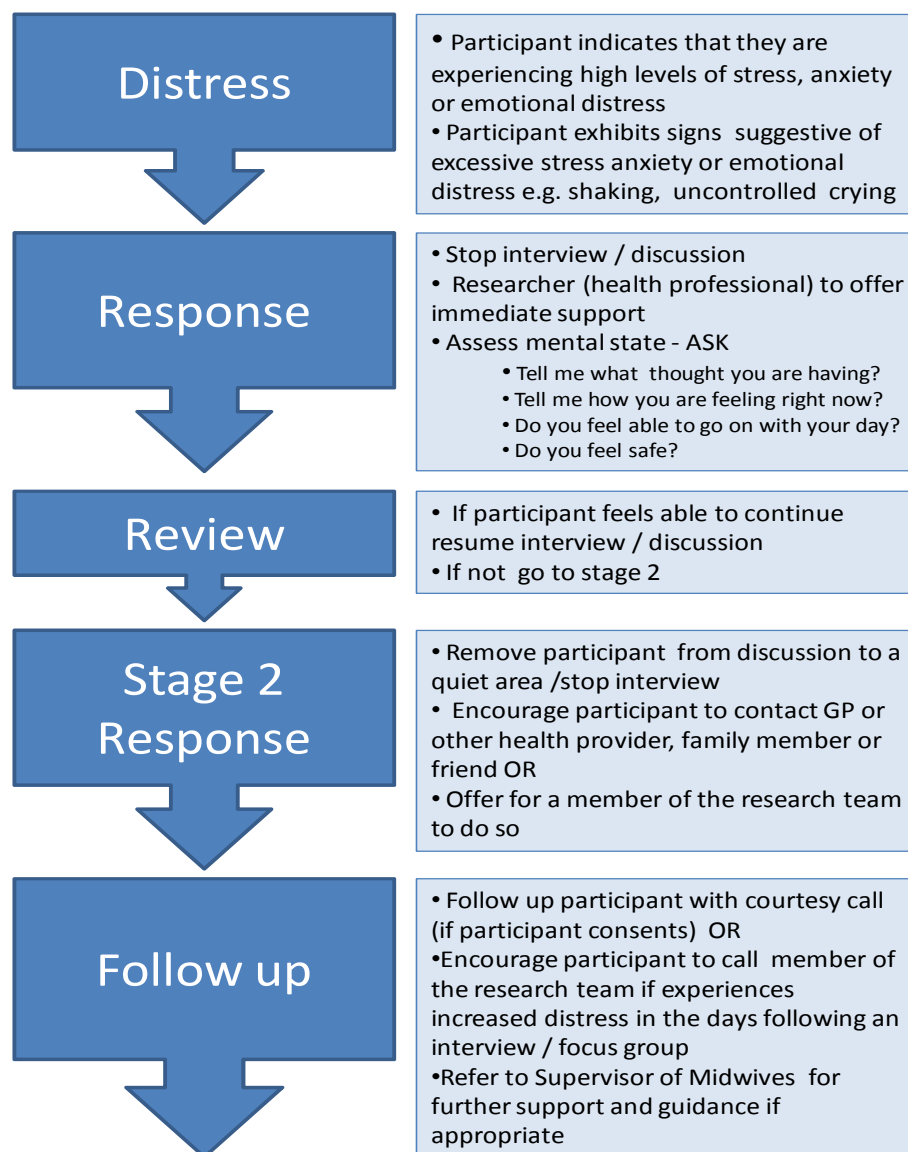

Adapted from Haigh and Witham (2010)<sup>41</sup>

1  
2  
3 **Appendix 12: Public Liability insurance**  
4  
5  
6  
7  
8  
9  
10  
11  
12  
13  
14  
15  
16  
17  
18  
19  
20  
21  
22  
23  
24  
25  
26  
27  
28  
29  
30  
31  
32  
33  
34  
35  
36  
37  
38  
39  
40  
41  
42  
43  
44  
45  
46  
47  
48  
49  
50  
51  
52  
53  
54  
55  
56  
57  
58  
59  
60

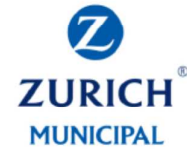

To Whom It May Concern

Our ref: SP/IND

3 June, 2015

Zurich Municipal Customer: The University of Manchester

This is to confirm that The University of Manchester have in force with this Company Public Liability Insurance until the policy expiry on 31 May 2016:

Policy Number: NHE-07CA03-0013

Limit of Indemnity: £ 50,000,000 any one claim

Excess: Nil any one claim

Zurich Municipal  
Zurich House  
2 Gladiator Way  
Farnborough  
Hampshire  
GU14 6GB

Telephone 0870 2418050  
Direct Phone 01252 387859  
Direct Fax 01252 375893  
E-mail [alison.cliff@uk.zurich.com](mailto:alison.cliff@uk.zurich.com)

Communications will be monitored regularly to improve our service and for security and regulatory purposes

Zurich Municipal is a trading name of Zurich Insurance Group Ltd

A public limited company incorporated in Ireland. Registration No. 13460  
Registered Office: Zurich House, Ballsbridge Park, Dublin 4, Ireland.

UK branch registered in England and Wales  
Registration No. BR7985.  
UK Branch Head Office: The Zurich Centre,  
3000 Parkway, Whiteley, Fareham, Hampshire  
PO15 7JZ

Authorised by the Central Bank of Ireland and subject to limited regulation by the Financial Conduct Authority. Details about the extent of our regulation by the Financial Conduct Authority are available from us on request.

Yours faithfully

Underwriting Services  
Zurich Municipal  
Farnborough

V 1.3  
21/10/15

**Appendix 13: Employers' Liability insurance**

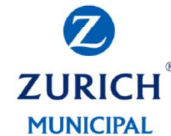

**Certificate of Employers' Liability Insurance(a)**

(Where required by regulation 5 of the Employers' Liability (Compulsory Insurance) Regulations 2008 (the Regulations), a copy of this certificate must be displayed at all places where you employ persons covered by the policy or an electronic copy of the certificate must be retained and be reasonably accessible to each employee to whom it relates).

Policy No. NHE-07CA03-0013

1. Name of policyholder The University of Manchester

2. Date of commencement of insurance policy 01 June 2015

3. Date of expiry of insurance policy 31 May 2016

We hereby certify that subject to paragraph 2:

1. The policy to which this certificate relates satisfies the requirements of the relevant law applicable in Great Britain, Northern Ireland, the Isle of Man, the Island of Jersey, the Island of Guernsey and the Island of Alderney (b)
2. (a) the minimum amount of cover provided by this policy is no less than £5 million (c)

Signed on behalf of Zurich Insurance plc (Authorised Insurer).

Signature

Stephen Lewis

Chief Executive Officer, Zurich Insurance plc (UK Branch)

Zurich Municipal is a trading name of Zurich Insurance plc  
A public limited company incorporated in Ireland  
Registration No. 13460 Registered Office Zurich House, Ballsbridge Park, Dublin 4 Ireland  
UK branch registered in England and Wales Registration No. BR 7985  
UK Branch Head Office The Zurich Centre, 3000 Parkway, Whiteley, Fareham, Hampshire PO15 7JZ

**Notes**

- (a) Where the employer is a company to which regulation 3(2) of the Regulations applies, the certificate shall state in a prominent place, either that the policy covers the holding company and all its subsidiaries, or that the policy covers the holding company and all its subsidiaries except any specifically excluded by name, or that the policy covers the holding company and only the named subsidiaries.
- (b) Specify applicable law as provided for in regulation 4(6) of the Regulations.
- (c) See regulation 3(1) of the Regulations and delete whichever of paragraphs 2(a) or 2(b) does not apply. Where 2(b) is applicable, specify the amount of cover provided by the relevant policy

Authorised by the Central Bank of Ireland and subject to limited regulation by the Financial Conduct Authority. Details about the extent of our regulation by the Financial Conduct Authority are available from us on request

1  
2  
3 **Appendix 14: Professional indemnity insurance**  
4  
5  
6  
7

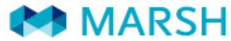

Cliffe Crowther  
Marsh Ltd  
Belvedere  
12 Booth Street  
Manchester  
M2 4AW  
+44 (0) 161 954 7317  
Fax +44 (0) 161 954 7210  
Cliffe.crowther@marsh.com  
www.marsh.com

14  
15 **To whom it may concern**  
16  
17  
18  
19

20  
21 29<sup>th</sup> May 2015  
22  
23

24 Dear Sirs,  
25

26 **CONFIRMATION OF INSURANCE – The University of Manchester and Subsidiary  
27 Companies**

28 As requested by the above client, we are writing to confirm that we act as Insurance Brokers to  
29 the client and that we have arranged insurance(s) on its behalf as detailed below:  
30

31 **PROFESSIONAL INDEMNITY INSURANCE**

|                     |                                                                                                    |
|---------------------|----------------------------------------------------------------------------------------------------|
| INSURERS            | Novae Underwriting Ltd.                                                                            |
| POLICY NUMBER       | 003210MMA15C                                                                                       |
| PERIOD OF INSURANCE | 01 June 2015 to 31 <sup>st</sup> May 2016, both dates inclusive.                                   |
| LIMIT OF INDEMNITY  | GBP10,000,000 any one claim and in the aggregate any one insurance period plus costs and expenses. |
| DEDUCTIBLE          | GBP20,000 each & every claim including costs and expenses                                          |

32  
33  
34  
35  
36  
37  
38  
39  
40  
41  
42  
43  
44  
45  
46  
47  
48  
49

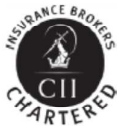

52 Registered in England Number: 1507274, Registered Office:  
53 1 Tower Place West, Tower Place, London EC3R 5BU.  
54 Marsh Ltd is authorised and regulated by the Financial Conduct  
55 Authority

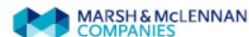

57  
58 V 1.3  
59 21/10/15  
60

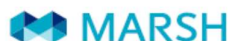

Page 2  
29<sup>th</sup> of May 2015

We have placed the insurance which is the subject of this letter after consultation with the client and based upon the client's instructions only. Terms of coverage, including limits and deductibles, are based upon information furnished to us by the client, which information we have not independently verified.

This letter is issued as a matter of information only and confers no right upon you other than those provided by the policy. This letter does not amend, extend or alter the coverage afforded by the policies described herein. Notwithstanding any requirement, term or condition of any contract or other document with respect to which this letter may be issued or pertain, the insurance afforded by the policy (policies) described herein is subject to all terms, conditions, limitations, exclusions and cancellation provisions and may also be subject to warranties. Limits shown may have been reduced by paid claims.

We express no view and assume no liability with respect to the solvency or future ability to pay of any of the insurance companies which have issued the insurance(s).

We assume no obligation to advise yourselves of any developments regarding the insurance(s) subsequent to the date hereof. This letter is given on the condition that you forever waive any liability against us based upon the placement of the insurance(s) and/or the statements made herein with the exception only of wilful default, recklessness or fraud.

This letter may not be reproduced by you or used for any other purpose without our prior written consent.

This letter shall be governed by and shall be construed in accordance with English law.

Yours faithfully

Cliffe Crowther

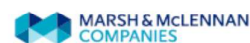

V 1.3  
21/10/15



## References

1. Beck S, Wojdyla D, Say L, *et al*. The worldwide incidence of preterm birth: a systematic review of maternal mortality and morbidity. *Bull World Health Organ* 2010;88:31–38. doi:10.2471/BLT.08.062554.
2. Health and Social Care Information Centre. *Hospital Episode Statistics: NHS Maternity statistics — England, 2013–14*. Leeds, HSIC.
3. Saigal S, Doyle LW. An overview of mortality and sequelae of preterm birth from infancy to adulthood. *Lancet* 2008;371:261–9.
4. D’Onofrio BM, Class QA, Rickert ME, *et al*. Preterm birth and mortality and morbidity: a population-based quasi-experimental study. *JAMA Psychiatry* 2013; 70(11):1231-1240. doi:10.1001/jamapsychiatry.2013.2107 .
5. Mangham LJ, Petrou S, Doyle LW, *et al*. The cost of preterm birth throughout childhood in England and Wales. *Pediatrics* 2009;123(2):e312–27. doi: 10.1542/peds.2008-1827.
6. Alfirevic Z, Allen-Coward H, Molina F, *et al*. Targeted therapy for threatened preterm labor based on sonographic measurement of the cervical length: a randomized controlled trial. *Ultrasound Obstet Gynecol* 2007;29:47–50. DOI: 10.1002/uog.3908.
7. Salim R, Garma G, Nachum Z, *et al*. Nifedipine compared with atosiban for treating preterm labor: a randomized controlled trial. *Obstet Gynecol* 2012;120:1323–31. DOI:10.1097/AOG.0b013e3182755dff
8. Roberts D, Dalziel SR. Antenatal corticosteroids for accelerating fetal lung maturation for women at risk of preterm birth. *Cochrane Database of Systematic Reviews* 2006, Issue 3. Art. No.: CD004454. DOI: 10.1002/14651858.CD004454.pub2.
9. Crowther CA, McKinlay CJD, Middleton P, Harding JE. Repeat doses of prenatal corticosteroids for women at risk of preterm birth for improving neonatal health outcomes.

- 1  
2  
3 *Cochrane Database of Systematic Reviews* 2015, Issue 7. Art. No.: CD003935. DOI:  
4  
5 10.1002/14651858.CD003935.pub4.  
6  
7 10. Doyle LW, Crowther CA, Middleton P, Marret S, Rouse D. Magnesium sulphate for women at  
8  
9 risk of preterm birth for neuroprotection of the fetus. *Cochrane Database of Systematic*  
10  
11 *Reviews* 2009, Issue 1. Art. No.: CD004661. DOI:10.1002/14651858.CD004661.pub3.  
12  
13 11. Royal College of Obstetricians and Gynaecologists. *Tocolysis for women in preterm labour:*  
14  
15 *Green-top Guideline No. 1b*. 2011. London: RCOG.  
16  
17 12. Murphy KE, Hannah ME, Willan AR, Hewson SA, Ohlsson A, Kelly EN, Matthews SG, Saigal S,  
18  
19 Asztalos E, Ross S, Delisle M-F, Amankwah K, Guselle P, Gafni A, Lee SK, Armson BA, for the  
20  
21 MACS Collaborative Group. Multiple courses of antenatal corticosteroids for preterm birth  
22  
23 (MACS): a randomised controlled trial. *Lancet* 2008;372: 2143–51.  
24  
25 13. Norberg H, Stålnacke J, Diaz Heijtz R, Smedler A-C, Nyman M, Forsberg H, Norman M.  
26  
27 Antenatal corticosteroids for preterm birth: dose-dependent reduction in birthweight,  
28  
29 length and head circumference. *Acta Paediatrica* 2011;100:364–9.  
30  
31 14. Asztalos E, Willan A, Murphy K, Matthews S, Ohlsson A, Saigal S, Armson A, Kelly E, Delisle  
32  
33 M-F, Gafni A, Lee S, Sananes R, Rovet J, Guselle P, Amankwah K, for the MACS-5  
34  
35 Collaborative Group. Association between gestational age at birth, antenatal  
36  
37 corticosteroids, and outcomes at 5 years: multiple courses of antenatal corticosteroids for  
38  
39 preterm birth study at 5 years of age (MACS-5). *BMC Pregnancy and Childbirth* 2014; 14:272.  
40  
41 15. Jacquemyn Y, Zecic A, Van Laere D, Roelens K. The use of intravenous magnesium in non-  
42  
43 preeclamptic pregnant women: fetal/neonatal neuroprotection. *Arch Gynecol Obstet*  
44  
45 2015;291:969–975.  
46  
47 16. Gyetvai K, Hannah ME, Ellen D, Hodnett ED, Ohlsson A. Tocolytics for preterm labour: a  
48  
49 systematic review. *Obstetrics and Gynecology* 1999;94(5):869–77.  
50  
51 17. Hill WC. Risks and complications of tocolysis. *Clinical Obstetrics and Gynecology*  
52  
53 1995;38(4):725–45.  
54  
55  
56  
57  
58  
59  
60

- 1  
2  
3 18. Kent RA, Yazbek M, Heyns T, et al. The support needs of high-risk antenatal patients in  
4  
5 prolonged hospitalisation. *Midwifery* 2015;31:164–9.
- 6  
7 19. Lasswell SM, Barfield WD, Rochat RW, Blackmon L. Perinatal Regionalization for Very Low-  
8  
9 Birth-Weight and Very Preterm Infants: A Meta-analysis. *JAMA*. 2010;304(9):992-1000.  
10  
11 doi:10.1001/jama.2010.1226.
- 12  
13 20. Marlow N, Bennett C, Drasper ES, Hennessy EM, Morgan AS, Costeloe KL. Perinatal  
14  
15 outcomes for extremely preterm babies in relation to place of birth in England: The EPICure  
16  
17 2 study. *Arch Dis Child Fetal Neonatal Ed* 2014;99:F181–88.
- 18  
19 21. Towers TV, Bonebrake R, Padilla G, Rumney P. The effect of transport on the rate of severe  
20  
21 intraventricular hemorrhage in very low birth weight infants. *Obstetrics and Gynecology*  
22  
23 2000;95(2):291–295.
- 24  
25 22. Porcellato L, Masson G, O’Mahony F, Jenkinson S, Vanner T, Cheshire K, Perkins E. ‘It’s  
26  
27 something you have to put up with’ — service users’ experiences of in utero transfer: a  
28  
29 qualitative study. *BJOG* 2015; DOI: 10.1111/1471-0528.13235.
- 30  
31 23. Bond PA, Crisp AS, Morgan MEI, Lobb MO, Cooke RWI. Maternal attitudes to transfer before  
32  
33 delivery. *Journal of Reproductive and Infant Psychology* 1984;2(1):33–41. DOI:  
34  
35 10.1080/02646838408403447.
- 36  
37 24. Wilson AM, MacLean D, Skeoch CH, Jackson L. An evaluation of the financial and emotional  
38  
39 impact of *in utero* transfers upon families: a Scotland-wide audit. *Infant* 2010;6(2):38–40.
- 40  
41 25. Coster-Schulz MA, Mackey MC. The preterm labour experience: a balancing act. *Clinical*  
42  
43 *Nursing Research* 1998;335–59.
- 44  
45 26. Gale C, Hay A, Phillip C, et al. In-utero transfer is too difficult: results from a prospective  
46  
47 study. *Early Human Development* 2012;88:147–50.
- 48  
49 27. Macintyre-Beon C, Skeoch C, Jackson J, Booth P, Cameron A. *Perinatal Collaborative*  
50  
51 *Transport Study: Final report*. 2008. Glasgow: Scottish Neonatal Transport Service.
- 52  
53  
54  
55  
56  
57  
58  
59  
60

- 1  
2  
3 28. O'Brien ET, Quenby S, Lavender T. Women's view of high risk pregnancy under threat of  
4  
5 preterm birth. *Sexual and Reproductive Health* 2010;1:79–84.  
6  
7 29. Hezelgrave NL, Shennan AH, David AL. Tests to predict imminent delivery in threatened  
8  
9 preterm labour. *BMJ* 2015;350:h2183 doi: 10.1136/bmj.h2183.  
10  
11 30. Chandiramani M, Di Renzo GC, Gottschalk E, Helmer H, Henrich W, Hoesli I, Mol B, Norman  
12  
13 JE, Robson S, Thornton S, Shennan A. Fetal fibronectin as a predictor of spontaneous  
14  
15 preterm birth: a European perspective. *The Journal of Maternal-Fetal & Neonatal Medicine*  
16  
17 2011;24(2):330–336.  
18  
19 31. Deshpande SN, van Asselt ADI, Tomini F, Armstrong N, Allen A, Noake C, et al. Rapid fetal  
20  
21 fibronectin testing to predict preterm birth in women with symptoms of premature labour: a  
22  
23 systematic review and cost analysis. *Health Technol Assess* 2013;17(40).  
24  
25 32. Radford S, Abbott D, Seed P, Kemp J, Shennan. Quantitative fetal fibronectin for the  
26  
27 prediction of preterm birth in symptomatic women. *Arch Dis Child Fetal Neonatal Ed*  
28  
29 2012;97(Suppl 1):A1–A125.  
30  
31 33. Harrison MJ, Kushner KE, Benzies K, et al. Women's satisfaction with their involvement in  
32  
33 health care decisions during a high-risk pregnancy. *Birth* 2003;30(2):109–15.  
34  
35 34. Hill JL, Campbell MK, Zou GY, et al. Prediction of preterm birth in symptomatic women using  
36  
37 decision tree modelling for biomarkers. *Am J Obstet Gynecol* 2008;198:468.e1-468.e9.  
38  
39 35. Gallagher K, Martin J, Keller M, et al. European variation in decision-making and parental  
40  
41 involvement during preterm birth. *Arch Dis Child Fetal Neonatal Ed* 2014;99:F245–9.  
42  
43 36. Peerzada JM, Schollin J, Håkansson S. Delivery room decision-making for extremely preterm  
44  
45 infants in Sweden. *Pediatrics* 2006;117(6):1988–95.  
46  
47 37. Smith J, Firth J. Qualitative data analysis: the framework approach. *Nurse Researcher*  
48  
49 2011;18(2):52–62.  
50  
51 38. Rabiee F. Focus group interview and data analysis. *Proceedings of the Nutrition Society*  
52  
53 2004;63: 655–660.  
54  
55  
56  
57  
58  
59  
60

- 1  
2  
3 39. Furber C. Framework analysis: a method for analysing qualitative data. *African Journal of*  
4  
5 *Midwifery and Women's Health* 2010;4(2):97–100.  
6  
7 40. Sword W. Accounting for presence of self: reflections on doing qualitative research.  
8  
9 *Qualitative Health Research* 1999;9(2):270–8.  
10  
11 41. Haigh C, Witham G. *Distress protocol for qualitative data collection*. 2015. [Online] available  
12  
13 at:  
14  
15 [http://www2.mmu.ac.uk/media/mmuacuk/content/documents/rke/Advisory%20Distress%2](http://www2.mmu.ac.uk/media/mmuacuk/content/documents/rke/Advisory%20Distress%20Protocol.pdf)  
16  
17 [0Protocol.pdf](http://www2.mmu.ac.uk/media/mmuacuk/content/documents/rke/Advisory%20Distress%20Protocol.pdf) accessed October 2015.  
18  
19  
20  
21  
22  
23  
24  
25  
26  
27  
28  
29  
30  
31  
32  
33  
34  
35  
36  
37  
38  
39  
40  
41  
42  
43  
44  
45  
46  
47  
48  
49  
50  
51  
52  
53  
54  
55  
56  
57  
58  
59  
60

# BMJ Open

## Study Protocol: Quantitative Fibronectin to help Decision-making in women with Symptoms of Preterm Labour (QUIDS) Part One- Individual Patient Data Meta-analysis and Health Economic Analysis

|                                 |                                                                                                                                                                                                                                                                                                                                                                                                                                                                                                                                                                                                                                                                                                                                                                                                                                                                                                                                                                                                                                                                                                                                                                                                                                                                                                                                                                                                                                                                                                                                                                                                                                                                                                                                                                                                                                                                               |
|---------------------------------|-------------------------------------------------------------------------------------------------------------------------------------------------------------------------------------------------------------------------------------------------------------------------------------------------------------------------------------------------------------------------------------------------------------------------------------------------------------------------------------------------------------------------------------------------------------------------------------------------------------------------------------------------------------------------------------------------------------------------------------------------------------------------------------------------------------------------------------------------------------------------------------------------------------------------------------------------------------------------------------------------------------------------------------------------------------------------------------------------------------------------------------------------------------------------------------------------------------------------------------------------------------------------------------------------------------------------------------------------------------------------------------------------------------------------------------------------------------------------------------------------------------------------------------------------------------------------------------------------------------------------------------------------------------------------------------------------------------------------------------------------------------------------------------------------------------------------------------------------------------------------------|
| Journal:                        | <i>BMJ Open</i>                                                                                                                                                                                                                                                                                                                                                                                                                                                                                                                                                                                                                                                                                                                                                                                                                                                                                                                                                                                                                                                                                                                                                                                                                                                                                                                                                                                                                                                                                                                                                                                                                                                                                                                                                                                                                                                               |
| Manuscript ID                   | bmjopen-2017-020796.R1                                                                                                                                                                                                                                                                                                                                                                                                                                                                                                                                                                                                                                                                                                                                                                                                                                                                                                                                                                                                                                                                                                                                                                                                                                                                                                                                                                                                                                                                                                                                                                                                                                                                                                                                                                                                                                                        |
| Article Type:                   | Protocol                                                                                                                                                                                                                                                                                                                                                                                                                                                                                                                                                                                                                                                                                                                                                                                                                                                                                                                                                                                                                                                                                                                                                                                                                                                                                                                                                                                                                                                                                                                                                                                                                                                                                                                                                                                                                                                                      |
| Date Submitted by the Author:   | 08-Feb-2018                                                                                                                                                                                                                                                                                                                                                                                                                                                                                                                                                                                                                                                                                                                                                                                                                                                                                                                                                                                                                                                                                                                                                                                                                                                                                                                                                                                                                                                                                                                                                                                                                                                                                                                                                                                                                                                                   |
| Complete List of Authors:       | <p>Stock, Sarah; University of Edinburgh MRC Centre for Reproductive Health, Tommy's Centre for Maternal and Fetal Health; University of Western Australia School of Women's and Infant's Health,<br/>         Wotherspoon, Lisa; University of Edinburgh MRC Centre for Reproductive Health, Tommy's Centre for Maternal and Fetal Health<br/>         Boyd, Kathleen; University of Glasgow, Health Economics &amp; Health Technology Assessment<br/>         Morris, R. K.; University of Birmingham, Institute of Metabolism and Systems Research<br/>         Dorling, Jon; Queen's Medical Centre, Neonatal Unit<br/>         Jackson, Lesley; Royal Hospital for Children Glasgow, Neonatal Unit<br/>         Chandiramani, Manju; Imperial College Healthcare NHS Trust, Queen Charlotte and Chelsea Hospital, Du Cane Road, Shepherds Bush, London, W12 0HS<br/>         David, Anna; University College London Medical School, Institute for Womens Health<br/>         Khalil, Asma; St. George's Medical School, University of London<br/>         Shennan, Andrew; Kings College London, Maternal and Fetal Research Unit<br/>         Hodgetts Morton, Victoria ; Birmingham Women's Hospital, Metchley Park Road, Edgbaston, ,<br/>         Lavender, Tina; Manchester University<br/>         Khan, Khalid; Queen Mary, University of London, Centre for Primary Care and Public Health<br/>         Harper-Clarke, Susan; PPI Representative<br/>         Mol, Ben; University of Adelaide, The Robinson Institute, School of Paediatrics and Reproductive Health<br/>         Riley, Richard; Keele University<br/>         Norrie, John; Edinburgh Clinical Trials Unit, University of Edinburgh No. 9, Bioquarter<br/>         Norman, Jane; University of Edinburgh MRC Centre for Reproductive Health, Tommy's Centre for Maternal and Fetal Health</p> |
| <b>Primary Subject Heading</b>: | Obstetrics and gynaecology                                                                                                                                                                                                                                                                                                                                                                                                                                                                                                                                                                                                                                                                                                                                                                                                                                                                                                                                                                                                                                                                                                                                                                                                                                                                                                                                                                                                                                                                                                                                                                                                                                                                                                                                                                                                                                                    |
| Secondary Subject Heading:      | Health economics, Diagnostics                                                                                                                                                                                                                                                                                                                                                                                                                                                                                                                                                                                                                                                                                                                                                                                                                                                                                                                                                                                                                                                                                                                                                                                                                                                                                                                                                                                                                                                                                                                                                                                                                                                                                                                                                                                                                                                 |
| Keywords:                       | Pregnancy, Preterm Birth, Fetal Fibronectin, Individual Patient Data Meta-analysis, HEALTH ECONOMICS                                                                                                                                                                                                                                                                                                                                                                                                                                                                                                                                                                                                                                                                                                                                                                                                                                                                                                                                                                                                                                                                                                                                                                                                                                                                                                                                                                                                                                                                                                                                                                                                                                                                                                                                                                          |

1  
2  
3  
4  
5  
6  
7  
8  
9  
10  
11  
12  
13  
14  
15  
16  
17  
18  
19  
20  
21  
22  
23  
24  
25  
26  
27  
28  
29  
30  
31  
32  
33  
34  
35  
36  
37  
38  
39  
40  
41  
42  
43  
44  
45  
46  
47  
48  
49  
50  
51  
52  
53  
54  
55  
56  
57  
58  
59  
60

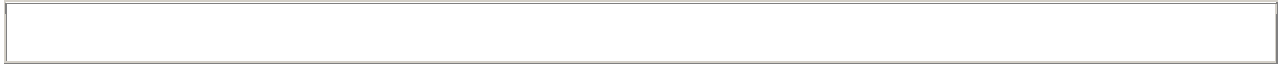

SCHOLARONE™  
Manuscripts

For peer review only

1  
2  
3 **Study Protocol: Quantitative Fibronectin to help Decision-making in women**  
4 **with Symptoms of Preterm Labour (QUIDS) Part One- Individual Patient Data**  
5 **Meta-analysis and Health Economic Analysis**  
6  
7

8 Sarah J Stock\*<sup>1,2</sup> Sarah.Stock@ed.ac.uk  
9  
10 Lisa Wotherspoon<sup>1</sup> Lisa.Wotherspoon@ed.ac.uk  
11  
12 Kathleen Boyd<sup>3</sup> Kathleen.Boyd@glasgow.ac.uk  
13  
14 Rachel K Morris<sup>4</sup> r.k.morris@bham.ac.uk  
15  
16 Jon Dorling<sup>5</sup> Jon.Dorling@nottingham.ac.uk  
17  
18 Lesley Jackson<sup>6</sup> Lesley.Jackson@ggc.scot.nhs.uk  
19  
20 Manju Chandiramani<sup>7</sup> m.chandiramani@imperial.ac.uk  
21  
22 Anna David<sup>8</sup> a.david@ucl.ac.uk  
23  
24 Asma Khalil<sup>9</sup> akhalil@sgul.ac.uk  
25  
26 Andrew Shennan<sup>10</sup> andrew.shennan@kcl.ac.uk  
27  
28 Victoria Hodgetts-Morton<sup>4</sup> v.a.h.morton@bham.ac.uk  
29  
30 Tina Lavender<sup>11</sup> Tina.Lavender@manchester.ac.uk  
31  
32 Khalid Khan<sup>12</sup> k.s.khan@qmul.ac.uk  
33  
34 Susan Harper-Clarke<sup>13</sup> su\_clarke@hotmail.com  
35  
36 Ben Mol<sup>14</sup> ben.mol@adelaide.edu.au  
37  
38 Richard D. Riley<sup>15</sup> r.riley@keele.ac.uk  
39  
40 John Norrie<sup>16</sup> J.Norrie@ed.ac.uk  
41  
42 Jane Norman<sup>1</sup> Jane.Norman@ed.ac.uk  
43

44 1. Tommy's Centre for Maternal and Fetal Health, University of Edinburgh MRC  
45 Centre for Reproductive Health, Queen's Medical Research Institute, Edinburgh, UK.  
46  
47 2. School of Women's and Infants' Health, University of Western Australia, Crawley  
48 WA 6009, AUS. 3. Institute of Health & Wellbeing Health Economics & Health  
49  
50 Technology Assessment, University of Glasgow, 1 Lilybank Gardens, Glasgow, UK.  
51  
52 4. School of Clinical and Experimental Medicine, University of Birmingham,  
53  
54 Birmingham, UK. 5. Queen's Medical Centre, Neonatal Unit, Derby Road,  
55  
56  
57  
58  
59



1  
2  
3 Nottingham, UK. 6. Royal Hospital for Children Glasgow, Neonatal Unit  
4 Glasgow, UK. 7. Imperial College Healthcare NHS Trust, Queen Charlotte and  
5 Chelsea Hospital, Du Cane Road, Shepherds Bush, London, UK. 8. University  
6 College London Medical School, Institute for Women's Health, 86-96 Chenies Mews,  
7 University College London Medical School London, UK. 9. St. George's Medical  
8 School, University of London, London, UK. 10. Kings College London, Maternal and  
9 Fetal Research Unit Maternal and Fetal Research Unit 10th Floor, North Wing  
10 London, UK. 11. University of Manchester School of Nursing, Midwifery & Social  
11 Work, Jean McFarlane Building, University Place, Oxford Road  
12 Manchester, UK. 12. Queen Mary, University of London, Centre for Primary Care and  
13 Public Health London, UK. 13. Patient and Public Involvement Representative. No  
14 affiliation. 14. University of Adelaide, The Robinson Institute, School of Paediatrics  
15 and Reproductive Health Adelaide, SA, AUS. 15. Research Institute for Primary Care  
16 and Health Sciences, Keele University, Keele, UK. 16. Edinburgh Clinical Trials Unit,  
17 University of Edinburgh No. 9, Bioquarter Edinburgh, UK.

18  
19  
20  
21  
22  
23  
24  
25  
26  
27  
28  
29  
30  
31  
32  
33  
34 \*Corresponding Author: Dr Sarah J Stock Senior Clinical Lecturer Maternal and Fetal  
35 Medicine, MRC Centre for Reproductive Health, Queen's Medical Research Institute,  
36 47 Little France Crescent, Edinburgh, EH16 4TJ. Tel: 0131 242 6449 Email:  
37 [sarah.stock@ed.ac.uk](mailto:sarah.stock@ed.ac.uk)

38  
39  
40  
41  
42  
43  
44 **Word Count:** 3,582

45  
46 **Key Words:** Pregnancy; Preterm Birth; Fetal Fibronectin; Health Economics;  
47 Individual Patient Data Meta-analysis.  
48  
49  
50  
51  
52  
53  
54  
55  
56  
57  
58  
59  
60

## ABSTRACT

**Introduction:** The aim of the QUIDS study is to develop a decision support tool for the management of women with symptoms and signs of preterm labour, based on a validated prognostic model using quantitative fetal Fibronectin (fFN) concentration, in combination with clinical risk factors.

**Methods and analysis:** The study will evaluate the Rapid fFN 10Q System (Hologic, Malborough, MA) which quantifies fFN in a vaginal swab. In part one of the study we will develop and internally validate a prognostic model using an individual participant data (IPD) meta-analysis of existing studies containing women with symptoms of preterm labour alongside fFN measurements and pregnancy outcome. An economic analysis will be undertaken to assess potential cost-effectiveness of the qfFN prognostic model. The primary endpoint will be the ability of the prognostic model to rule out spontaneous preterm birth within seven days. Six eligible studies were identified by systematic review of the literature and five agreed to provide their IPD (n= 5 studies, 1,783 women and 139 events of preterm delivery within 7 days of testing).

**Ethics and dissemination:** The study is funded by the National Institute of Healthcare Research Health Technology Assessment (HTA 14/32/01). It has been approved by the West of Scotland Research Ethics Committee (16/WS/0068).

**Registration details:** This IPD Meta-analysis is registered with PROSPERO (PROSPERO 2015:CRD42015027590).

**Version:** Protocol Version 2, Date 1<sup>st</sup> November 2016

## STRENGTHS AND LIMITATIONS OF THIS STUDY

### Strengths

- Development of prognostic model and for validation in a separate prospective cohort study

- 1  
2  
3 • Health Economic Analysis to determine cost effectiveness from NHS  
4 perspective  
5  
6  
7

8  
9 **Limitations**

- 10 • Not a randomized control trial to test effectiveness of the model on improved  
11 patient outcomes  
12  
13  
14  
15

16  
17 **HOW PATIENTS ARE INVOLVED IN THIS STUDY**

18 Patient representatives were consulted during the protocol development and  
19 have been invited to join the Project Management Group and the Trial Steering  
20 Committee. Prior to commencing QUIDS, we performed a qualitative study to  
21 determine the decisional needs of pregnant women with signs and symptoms of  
22 preterm labour, their partners and their caregivers. This is described in the  
23 separate protocol “QUIDS Qualitative” (Supplementary Material). The end  
24 product of QUIDS will be a decision support aid to help clinicians, women and  
25 their partners decide on management of threatened preterm labour, based on the  
26 results of the quantitative fFN. In QUIDS Qualitative women and clinicians  
27 indicated that they would prefer this to be on web based or mobile app based  
28 format, presenting the risk of preterm birth within seven days of testing.  
29  
30  
31  
32  
33  
34  
35  
36  
37  
38  
39  
40  
41  
42  
43  
44  
45  
46  
47  
48  
49  
50  
51  
52  
53  
54  
55  
56  
57  
58  
59  
60

## INTRODUCTION

The overall aim of the QUIDS study is to develop a decision support tool for the management of women with symptoms and signs of preterm labour, based on a validated prognostic model using quantitative fFN testing. The study has been conceptually divided into two parts. In this, the protocol for QUIDS Part One, we detail the protocol for development and internal validation of the prognostic model. In the protocol for QUIDS Part Two we detail the protocol for the prospective cohort for external validation of the prognostic model and acceptability testing.[1]

Preterm delivery (before 37 weeks) occurs in 7.1% of pregnancies in the UK (>50,000 deliveries per annum), with the majority the result of preterm labour.[2,3] It remains the leading cause of neonatal morbidity and mortality, but timely interventions, such as antenatal steroids to promote lung maturity, magnesium sulphate for neuroprotection, and delivery in a unit with appropriate neonatal care facilities can improve neonatal outcome. Establishing a diagnosis of preterm labour is, however, difficult. Clinical signs are non-specific and false positive diagnoses are common, with up to 80% of women with signs and symptoms of preterm labour remaining pregnant after seven days. [4, 5] Such diagnostic uncertainty means a large proportion of women with symptoms of preterm labour are treated unnecessarily to ensure benefits to the small proportion of babies that do actually do deliver preterm.

It is understandable that both clinicians and pregnant women may prefer a 'treat-all' approach in women with symptoms of preterm labour, particularly in a setting remote from an appropriate neonatal unit; and in order to ensure steroid prophylaxis in case preterm delivery occurs. However, unnecessary interventions result in both a substantial economic burden to health services and in potential adverse maternal and neonatal events. Hospital admission and inter-hospital transfer have

1  
2  
3 considerable cost implications and can be associated with enormous problems for  
4 women and their families due to physical separation and emotional stress.[6,7]  
5 Neonatal cots become 'blocked' in order to accept a preterm baby just in case  
6 delivery occurs; negatively impacting the efficiency of already stretched neonatal  
7 units and networks. This frequently has knock-on effects to other women and babies,  
8 who may need transfer to another unit due to lack of cot availability despite an  
9 empty, but 'blocked', cot. It also may increase the number of *ex utero* transfers,  
10 which are associated with poorer outcomes than *in utero* transfers.[8] If preterm  
11 labour has been wrongly diagnosed, and delivery does not occur, steroids may also  
12 have adverse long-term consequences for the baby, especially if multiple courses  
13 are given.[9] Tocolytic therapy, even when appropriate can have serious side effects  
14 for both mother and baby.[10] Lastly, uncertainty of outcome may contribute to the  
15 high anxiety scores seen in women with threatened preterm labour and their  
16 partners.[11]

17  
18  
19 Diagnostic tests for preterm labour are available and used in many units in the UK.  
20 Fetal Fibronectin (fFN; Hologic, Marlborough, MA, USA) is a biochemical marker of  
21 preterm labour that can be measured in samples of cervicovaginal secretions  
22 collected at a speculum examination. It has potential to help improve diagnosis of  
23 impending preterm delivery.[12] Other biochemical tests which are available include  
24 Actim Partus (Medixbiochemica, Espoo, Finland) which measures phosphorylated  
25 insulin-like growth factor binding protein-1 (plIGFBP-1), and Partosure (Parsagen  
26 Diagnostics, Boston, MA, USA) which measures placental alpha microglobulin-1  
27 (PAMG-1). An alternative approach (which can be combined with fFN) is to measure  
28 the cervical length using transvaginal ultrasound, as the longer the cervix is, the less  
29 likely a preterm delivery.[12]

1  
2  
3 As part of an Health Technology Assessment (HTA) report Honest et al found that a  
4 qualitative fFN test (giving a positive or negative result based on a single threshold of  
5 50ng/ml) was potentially useful in the prediction of preterm delivery <34 weeks  
6 gestation, with its main benefit relating to its high negative predictive value i.e. its  
7 ability to rule out impending delivery.[12] A more recent HTA-funded review found  
8 that qualitative fFN testing has moderate accuracy for predicting preterm birth with  
9 overall sensitivity and specificity estimates of 76.7% and 82.7% for delivery within 7-  
10 10 days.[13] These estimates suggest that qualitative testing on its own would not  
11 have the sensitivity to rule out preterm delivery adequately, although in systematic  
12 review of clinical trials, no increase in neonatal morbidity or mortality was seen in  
13 association with false negative fFN results.[13] The authors concluded that this  
14 observation is likely to relate to the multifactorial nature of assessment of the risk of  
15 preterm delivery, where, in practice, fFN is just one component of the clinical  
16 assessment on which management decisions are based.[13]  
17  
18  
19  
20  
21  
22  
23  
24  
25  
26  
27  
28  
29  
30  
31

32 Both HTA reviews described above examined the performance of a qualitative fFN  
33 test, which provided a positive or negative result on the basis of a single threshold of  
34 50ng/ml. Recently, this test has been replaced in the UK with the Rapid fFN 10Q  
35 System, which provides a concentration of fFN within 10 minutes, and thus may be a  
36 more useful predictor of preterm delivery (quantitative fFN). We surveyed current  
37 practice in UK maternity units (response rate 66% [137/207]; Mar-July 2014).[14]  
38 135/137 units (98.5%) use some sort of diagnostic test of preterm labour. The most  
39 common test is fFN (84/137 units; 61.3%). fFN is now only available with a  
40 quantitative analyser in the UK, but there is no consensus as to which women to use  
41 the test in, or how to interpret the results. Developing and evaluating a decision  
42 support for qfFN is thus likely to improve decision making, even if qfFN is already  
43 available in clinical practice. Evidence about the potential value of the new  
44  
45  
46  
47  
48  
49  
50  
51  
52  
53  
54  
55  
56  
57  
58  
59  
60

1  
2  
3 quantitative fFN is required, along with guidance about how to interpret results. The  
4  
5 QUIDS study will address this evidence gap.  
6  
7

## 8 9 **METHODS AND ANALYSIS**

### 10 **Aims and Methodologies**

11  
12 The aim of the QUIDS study is to develop a decision support tool for the  
13  
14 management of women with symptoms and signs of preterm labour, based on a  
15  
16 validated prognostic model using quantitative fFN testing.  
17

18 The study protocol has been divided into two parts (see flow chart Figure 1). The  
19  
20 protocols for Parts One and Two are reported in separate manuscripts.  
21  
22

#### 23 24 Part 1: Development and Internal Validation of Prognostic Model

25  
26 i) Individual Participant Data (IPD) meta-analysis to develop a prognostic model  
27  
28 using quantitative fFN and other risk (prognostic) factors and to evaluate the added  
29  
30 value of quantitative fFN toward this prognostic model performance. A prognostic  
31  
32 model will be developed and internally validated[15,16] based on a meta-analysis of  
33  
34 IPD from existing prospective cohort studies where quantitative fFN results and  
35  
36 pregnancy outcome details are available. The primary outcome will be prediction will  
37  
38 be delivery within 7 days, although other endpoints will be included if recommended  
39  
40 by focus groups.  
41

42 (ii) Economic Analysis: To provide an economic rationale for the prognostic model  
43  
44 and analyze its cost-effectiveness from the perspective of the NHS to provide an  
45  
46 economic rationale for the prognostic model and the risk factors included in it.  
47  
48  
49

50 Part 2: Validation And Refinement Of Prognostic Model Involves a prospective cohort  
51  
52 study and acceptability testing, with external validation, (and, if necessary,  
53  
54 refinement) of the prognostic model, and update of health economic model.[1]  
55  
56  
57  
58  
59

## Endpoints

The primary endpoint is spontaneous preterm delivery within seven days of qfFN test, in women tested at less than 36 weeks gestation. This is both an important endpoint for women and caregivers (determined in QUIDS Qualitative study – a preceding qualitative study to identify the decisional needs of women, their partners and clinicians; Supplementary Material) as well as a clinically important endpoint. Antenatal steroids (which significantly reduce morbidity and mortality in preterm babies[17]) are most effective if delivery occurs within seven days of administration. As repeated doses of antenatal steroids may be harmful, it is crucial to ensure steroids are timed correctly.

A secondary endpoint suggested by the preceding QUIDS Qualitative Study consultation (Supplementary Material), was delivery within 48 hours of qfFN test. This analysis will be performed if feasible to do so within the constraints of the data available for model development.

## Health technologies being assessed

The study will evaluate the Rapid fFN 10Q System (Hologic), which provides a concentration of fFN (ng/ml or INVALID) in a vaginal swab sample. Further details about the system and recommended sampling technique are provided in the QUIDS Protocol Part Two. [1]

## Target population

The target population is pregnant women attending hospital with signs and symptoms of preterm labour.

## Development Of Prognostic Model



### Individual Patient Data Meta-Analysis

The proposed IPD-Meta-analysis was registered on PROSPERO (2015:CRD42015027590). Our IPD meta-analytical approach will follow existing guidelines, and our output will comply with the TRIPOD statement (Transparent reporting of a multivariable prediction model for individual prognosis or diagnosis statement).[18]

#### *Inclusion Criteria*

We prespecified inclusion of prospective cohort studies or RCTs of women with signs and symptom of preterm labour (as defined by investigators) that include quantitative fFN results determined by 10Q rapid fFN analyzer system and pregnancy outcome data; and the Principal Investigator of which has agreed to collaborate and provide data.

#### *Exclusion criteria*

We will exclude studies where fFN concentration was measured by ELISA and studies where IPD is not available for meta-analysis

#### *Search Strategy*

When applying for funding for this study (April 2014) we performed a literature search for completed and ongoing cohort studies of quantitative fFN using search terms for quantitative fetal/foetal fibronectin and preterm birth, including databases (MEDLINE, EMBASE, Cochrane Database of Systematic Reviews (CDSR), Database of Abstracts of Reviews of Effects (DARE) and Health Technology Assessment Database (HTA)) and clinical trial registries (Cochrane Central Register of Controlled Trials (CENTRAL), ClinicalTrials.Gov) general search engines (such as Google: <https://www.google.co.uk>) and systematic reviews. We also consulted preterm birth

1  
2  
3 researchers and networks (RCOG CSG; BMFMS, PREBIC) and the manufacturers  
4 of quantitative fFN, (Hologic) to help ensure capture of all relevant studies.  
5  
6  
7

8  
9 Study manuscripts and/or protocols were screened by two researchers. We identified  
10 a total of 10 studies of quantitative fFN that were potentially eligible. Four early  
11 datasets (in three manuscripts) used ELISA to determine the concentration of fFN  
12 and were excluded as the different method of analysis and earlier period of study  
13 would increase heterogeneity.[5,19,20] Therefore, six studies fulfilled the eligibility  
14 criteria (see Table 1).  
15  
16  
17  
18  
19

#### 20 21 22 *Establishment of the quantitative fFN IPD Collaboration*

23  
24 We contacted the principal investigators (PIs) of the six eligible studies of qfFN  
25 invited them to participate (see Table 1). Five of these agreed to provide their IPD as  
26 evidenced by their involvement as co-applicants on the funding application and/or co-  
27 authorship of this protocol (Mol, van Baaren, Khalil, Shennan, David). The PI of the  
28 6<sup>th</sup> study (Elovitz) indicated IPD may be available after publication of her study.  
29  
30  
31  
32  
33  
34  
35

36  
37 The five included studies (Table 1) are European studies of women with symptoms of  
38 preterm labour, comprising 1,783 women and 139 events of preterm delivery within 7  
39 days of testing. They are from consultant led maternity units in the UK (three studies)  
40 and Europe (two studies). All women in the included trials provided informed consent  
41 for participation in clinical trials, and for their IPD to be used in subsequent analyses.  
42  
43  
44  
45  
46  
47  
48  
49  
50  
51  
52  
53  
54  
55  
56  
57  
58  
59  
60

|                                                                                                                    | PI             | Setting                  | N            | Events     | Dates      | Inclusion                                                      | Primary Outcome                      |
|--------------------------------------------------------------------------------------------------------------------|----------------|--------------------------|--------------|------------|------------|----------------------------------------------------------------|--------------------------------------|
| <b>Studies with data available</b>                                                                                 |                |                          |              |            |            |                                                                |                                      |
| EQUIPP [21,22]                                                                                                     | Prof A Shennan | 5 UK centres             | 452          | 14         | 2010-2012  | 22-35 weeks with symptoms of preterm labour                    | Delivery <34 weeks gestation         |
| EUFIS* [23]                                                                                                        | Prof BW Mol    | 10 European Hospitals    | 452          | 48         | 2012-2014  | 24-34 weeks with preterm contractions and intact membranes     | Delivery within 7 days of test       |
| APOSTEL I* [24]                                                                                                    | van Baaren     | 10 Dutch Hospitals       | 528          | 70         | 2009 -2012 | 24-34 weeks with preterm contractions and intact membranes     | Days to delivery truncated at 7 days |
| QFCAPS (unpublished)                                                                                               | Dr A Khalil    | London teaching hospital | 86           | 2          | 2012-2014  | 24-34 weeks with symptoms of preterm labour<br>Singletons only | Delivery within 7 days of test       |
| UCLH/Whit (unpublished)                                                                                            | Dr A David     | 2 UK centres             | 262          | 5          | 2009-2010  | 22-35 weeks with symptoms of preterm labour                    | Delivery within 7 days of test       |
|                                                                                                                    | <b>TOTALS</b>  | <b>4 studies</b>         | <b>1,783</b> | <b>139</b> |            |                                                                |                                      |
| <b>Studies where data may be available in future</b>                                                               |                |                          |              |            |            |                                                                |                                      |
| STOP study ( <a href="http://clinicaltrials.gov/show/NCT01868308">http://clinicaltrials.gov/show/NCT01868308</a> ) | Prof M Elovitz | USA teaching hospital    | 700          | NK         | 2011-2015  | 22 -34 weeks<br>Symptomatic women with singleton pregnancy     | Delivery before 37 weeks             |

Table 1: Details of studies contributing data to IPD meta-analysis.

\*Study unpublished at time of search in April 2014; manuscript now published

## 1 *Study Quality Assessment and Data Collection*

2 IPD will be stored in a bespoke database on a secure server at the University of  
3 Edinburgh. PIs will be asked to provide de-identified data, and consider all recorded  
4 variables (even if not reported publications). We will assess study quality according  
5 to QUADAS-2[25] QUIPS[26] and CHARMS[27] guidelines.

## 6 7 *Sample Size Considerations*

8 The size of the IPD meta-analysis is limited by the number of studies with data  
9 available (Table 1). In model development the number of covariates that can be  
10 considered is limited by the number of events, with guidance suggesting at least ten  
11 events required for each covariate.[28,29] In our IPD meta-analysis data we have  
12 139 events (preterm labour within 7 days of testing) and therefore deemed that it was  
13 sensible to evaluate quantitative fFN and up to 13 other factors (covariates) for  
14 potential inclusion in our model.

## 15 16 *Data Items*

17 The following factors which are thought to influence risk of spontaneous preterm  
18 birth, will be requested and considered for inclusion as covariates in the prognostic  
19 model: quantitative fFN concentration, previous spontaneous preterm labour,  
20 gestation at fFN test, age, ethnicity, BMI, smoking, deprivation index, number of  
21 uterine contractions in set time period, cervical dilatation, vaginal bleeding, previous  
22 cervical treatment for cervical intraepithelial neoplasia, cervical length (measured by  
23 transvaginal cervical length), singleton/multiple pregnancy, tocolysis and fetal sex.  
24 Up to 13 of these will be prespecified for inclusion, based on available data (we will  
25 only use variables which are available in each study), and ranking for likely clinical  
26 relevance as agreed by consensus of the project management team.

## 27 28 *Data Cleaning*

1 Prior to analysis data will be checked for outliers and missing data will be identified.  
2  
3  
4 Descriptive statistics will be performed to summarise data. Problems identified will be  
5  
6 discussed with the PI of the original study, and amended as indicated by consensus  
7  
8 discussion.  
9

10

#### 11 *Data Analysis and Prognostic Model Development*

12  
13 Multivariable logistic regression modelling will be the primary method of analysis. The  
14  
15 primary endpoint for the prognostic model will be delivery within seven days. Another  
16  
17 endpoint found to be important in focus group consultations performed in QUIDS  
18  
19 Qualitative (Supplementary Material) included delivery within 48 hours, and we will  
20  
21 use this as a secondary endpoint if feasible (i.e. if sufficient number of cases with  
22  
23 delivery within 48 hours). We will develop an initial model with quantitative fFN  
24  
25 concentration, and then consider a model with other predefined clinical predictor  
26  
27 variables (see *Data Items*, above).  
28

29

30  
31 Tocolysis (which may delay onset of labour, although likely not beyond 48 hours) will  
32  
33 be included as a categorical variable (administered/not administered). We will  
34  
35 explore treatment effect by sensitivity analysis with and without the assumption that  
36  
37 tocolysis could delay delivery within 48 hours by a maximum odds ratio of 5.39, 95%  
38  
39 credible interval 2.14 to 12.34, based on data in Haas et al.[30].  
40

41

42  
43 As the outcome is binary, a logistic regression modelling framework will be used to  
44  
45 develop the model. A multi-level structure will be used to account for clustering of  
46  
47 patients within studies, and heterogeneity of the effects of included factors (hereafter  
48  
49 called 'predictors') will be accounted for using random-effects, with between-study  
50  
51 heterogeneity quantified using the estimated variance ('tau-squared') and the  $I^2$   
52  
53 statistic. A separate intercept term per study will be included in the model, to account  
54  
55 for the clustering and also gauge how predictions may require tailoring to different  
56  
57 populations. Predictors with large heterogeneity in the prognostic effect across  
58  
59

1 studies may be removed to ensure summary Beta terms in the model are meaningful  
2 (accurate) for individual populations.[16]

3  
4 In the primary analysis, we will use data from the first recorded attendance with signs  
5 and symptoms of preterm labour to determine the relationship between that individual  
6 episode and outcome. Data from subsequent attendances will be analysed  
7 subsequently, and may be included in an appropriate model. As a parsimonious model  
8 is sought, to reduce the factors included in the model that may otherwise delay its  
9 use, we will use backward stepwise selection based on an information criterion (e.g.  
10 Akaike's information criterion  $p < 0.15$ ) to identify a parsimonious set of factors to be  
11 included in the model; hereafter these are referred to as included 'predictors'.  
12 Further, an approach of adding specialist tests, such as cervical length, only after  
13 considering simpler clinical assessment will be used, to maximise the utility of the  
14 model by ensuring that extra tests with their additional costs are only be included if  
15 they add to the predictive power.

16  
17 Linearity between continuous variables and outcome will be assessed using cubic  
18 spline plots and data will be transformed where appropriate before inclusion in  
19 multivariable analysis (e.g. using fractional polynomial methods). Missing data will be  
20 assessed to determine whether missing at random is appropriate, and if so, multiple  
21 imputation of observed participant characteristics will be used, with missing data  
22 imputed within each original study separately, before the meta-analysis. The results  
23 of these analyses will be compared with a complete case analysis.

#### 24 25 *Assessing Apparent Model Performance*

26 The apparent performance of the model will be assessed by its overall fit, and the  
27 observed discrimination and calibration in the IPD used to develop the model. Overall  
28 fit of the models will be expressed with Nagelkerke  $R^2$ . The ability of the models to  
29 discriminate between women with and without spontaneous preterm birth will be

1 determined by the area under the receiver operating characteristics curve (AUC),  
2 also known as the *C* statistic. Agreement between predicted and observed  
3 proportions of women with spontaneous preterm birth will be visualized using a  
4 calibration plot, and measured using calibration slope and calibration-in-the-large.

5

#### 6 *Internal validation: assessing Optimism In Model Performance*

7 Apparent performance is likely to be optimistic, as it is examined in the same data  
8 used for model development. Therefore internal validation will also be undertaken  
9 using a non-parametric bootstrap re-sampling technique in which each modelling  
10 step is repeated in each bootstrap sample, to obtain a new model in each bootstrap  
11 sample, and then its apparent performance (AUC and calibration slope) in the  
12 bootstrap sample is compared to its performance in the original dataset. The  
13 'optimism' is the mean difference (across all bootstrap samples) between the  
14 apparent value in the bootstrap sample and the observed value in the original  
15 dataset. This optimism estimate is then subtracted from the original model's apparent  
16 performance, to give an optimism-adjusted estimate of each measure of performance  
17 for the original model (e.g.  $R^2$ , *C* statistic, Calibration slope).

18

#### 19 *Production Of Final Model From IPD Meta-Analysis Via Uniform Shrinkage*

20 The optimism-adjusted calibration slope will be used as a uniform shrinkage factor, to  
21 adjust the parameter estimates (log odds ratios) of the original model. The beta  
22 coefficients in the original model will be multiplied by the shrinkage factor, and the  
23 study intercept terms re-estimated to ensure perfect overall calibration is maintained  
24 (across all studies and, ideally, in each study separately). This will thereby produce a  
25 final model containing the updated intercepts and the shrunken beta coefficients.[31]  
26 With multiple intercepts, a strategy (or strategies) will be developed amongst the  
27 study investigators for which intercept should be chosen for use when externally  
28 validating the model in a new population (e.g. choose intercept from study that most

1 closely resembles the population of application); each strategy will be evaluated and  
2 compared in the cohort study external validation phase.

3

#### 4 *Added Value Of Quantitative fFN*

5 The added value of quantitative fFN will be examined throughout the whole model  
6 process, in particular its improvement on discrimination, calibration and other  
7 meaningful factors (such as clinical decisions) using appropriate techniques (such as  
8 net reclassification improvement and decision analysis methods).

9

#### 10 *Subgroup analyses*

11 Subgroup analysis will be performed for multiple pregnancy, women with a previous  
12 preterm labour, gestation and those with criteria that are suggested to indicate  
13 preterm labour (number of uterine contractions in a set time period and/or cervical  
14 change). This will allow us to do a subgroup-analysis in which we assess whether the  
15 predictive capacity of quantitative fFN is similar in all subgroups.

16

#### 17 *Health Economic Analysis*

18 An early stage decision-analytic model will be built using evidence from current  
19 literature and from the IPD meta-analysis to explore the potential cost-effectiveness  
20 of different prognostic models including quantitative fFN.

21 A literature review will be undertaken to inform model design and identify additional  
22 model parameters with searches of Medline, Embase, Cochrane Library and the  
23 Paediatric Economic Database Evaluation for economic analyses including the use of  
24 fFN testing in woman with threatened preterm labour. Any evidence on resource use  
25 (test administration, treatments for preterm labour, hospital stay, hospital transfers,  
26 etc), quality of life and diagnostic outcome data from the IPD meta-analysis will be  
27 synthesized with the wider evidence based on current practice for women attending  
28 hospital with signs and symptoms of preterm labour. The economic analysis will be  
29 undertaken from the perspective of the UK NHS adhering to good practice guidelines



1 and the NICE reference case.[32] A decision tree will be developed to model the  
2 clinical pathway. The model will be used to explore potential cost effectiveness of  
3 the prognostic model at different thresholds on the Receiver Operator Curve,  
4 providing an economic rationale for the chosen prognostic model.  
5

## 6 **ETHICS AND DISSEMINATION**

### 7 **Trial Management And Oversight Arrangements**

#### 8 Project Management Group

9 The trial will be coordinated by a Project Management Group (PMG), consisting of  
10 the grant holders (Chief Investigator and Co-applicants), the trial manager,  
11 representatives from the Study Office and CHaRT (the supporting CTU), plus service  
12 user representatives (PAG). The PMG will meet approximately every four months by  
13 teleconference or face to face.  
14

#### 15 Trial Steering Committee and Data Monitoring Committee

16 A combined Trial Steering Committee and Data Monitoring Committee (TSC/DMC)  
17 will oversee the conduct and progress of the study. The terms of reference of the  
18 Committee will be developed separately. Members of the TSC/DMC will consist of  
19 experts and two patient representatives.  
20

#### 21 **Good Clinical Practice**

22 The study will be conducted in accordance with the principles of Good Clinical  
23 Practice (GCP). A favorable ethical opinion has been obtained from the appropriate  
24 REC (reference 16/WS/0068) and local R&D approval will be obtained prior to  
25 commencement of the study at each site.  
26

#### 27 **Dissemination**

28 On completion of the study, the study data will be analysed and tabulated, and a  
29 clinical study report will be prepared. Results will be communicated to the academic

1 community via the scientific literature, attendance at conferences and invited  
2 presentations. The TRIPOD reporting guidelines will be adhered to.[18] Summaries  
3 of results will also be made available to investigators for dissemination within clinics.  
4 Social media will be used to signpost publications and conference presentations and  
5 highlight important findings. Twitter and Facebook will be used to disseminate  
6 findings to professional organizations, charities, stakeholders and the public.  
7 Communication to the general public will further be facilitated by our close links with  
8 charities such as Tommy's [33].

#### 10 **PEER REVIEW**

11 The study was extensively peer reviewed as part of the process of gaining grant  
12 funding from the NIHR HTA (14/32/01).

#### 14 **FUNDING**

15 This project was funded by the National Institute of Healthcare Research Health  
16 Technology and Assessment (Reference 14/32/01). The views expressed are those  
17 of the authors and not necessarily those of the NHS, the NIHR or the Department of  
18 Health.

#### 20 **CONTRIBUTIONS TO AUTHORSHIP**

21 SJS, KB, RKM, JD, LJ, MC, AD, AK, AS, VHM, TL, KK, SHC, BM, RDR, JN and JEN  
22 developed the protocol. SJS, LW, RDR, KB, TL and JN drafted the protocol. RKM,  
23 JD, LJ, MC, AD, AK, AS, VHM, KK, SHC, BM and JEN reviewed and commented on  
24 the protocol.

#### 26 **COMPETING INTERESTS**

27 SJS and JEN work at the University of Edinburgh, who received £1000 sponsorship  
28 from Hologic to support a meeting (The Society of Reproductive Investigation and

1 MRC Centre for Reproductive Health Scientific Symposium on Targeting  
2 Inflammation to Improve Reproductive Health across the Lifecourse – August 2017).  
3 AS has in the past (over last five years; not in the last three years) received funding  
4 for expenses related to advisory board and internal staff education from Hologic.  
5 MC received sponsorship from Hologic to organise an educational teaching focusing  
6 on prediction of Preterm Birth at the 2017 annual meeting of the British Maternal and  
7 Fetal Medicine Society.  
8 Hologic, the makers of fFN have provided analysers and technical support for their  
9 use to sites participating in the QUIDS prospective cohort study. They have no  
10 access to the data, or other involvement in the conduct, analysis, interpretation or  
11 decision to publish the results of the study.

## 13 REFERENCES

- 14 1. Stock SJ, Wotherspoon L, Boyd K et al. Study Protocol: Quantitative Fibronectin to  
15 help Decision-making in women with Symptoms of Preterm Labour (QUIDS)  
16 Part Two- Prospective Cohort Study. *Submitted to BMJ Open alongside this*  
17 *manuscript(see supplementary information)*
- 18 2. Office for National Statistics (2013). ONS gestation-Specific Infant Mortality in  
19 England and Wales 2011. Cardiff ONS, 2013. Also available at:  
20 [https://www.ons.gov.uk/peoplepopulationandcommunity/healthandsocialcare/  
21 causesofdeath/bulletins/pregnancyandethnicfactorsinfluencingbirthsandinfant  
22 mortality/2013-10-10](https://www.ons.gov.uk/peoplepopulationandcommunity/healthandsocialcare/causesofdeath/bulletins/pregnancyandethnicfactorsinfluencingbirthsandinfantmortality/2013-10-10) (accessed 23<sup>rd</sup> November 2017).
- 23 3. Information Services Division (2013). "Births in Scottish hospitals 2012". Edinburgh  
24 National Services Scotland, 2013. Also available at:  
25 [http://www.isdscotland.org/Health-Topics/Maternity-and-  
26 Births/Publications/2013-08-27/2013-08-27-Births-Report.pdf?34511965514](http://www.isdscotland.org/Health-Topics/Maternity-and-Births/Publications/2013-08-27/2013-08-27-Births-Report.pdf?34511965514)  
27 (accessed 23<sup>rd</sup> November 2017).

- 1 4. Kenyon SL, Taylor DJ, Tarnow-Mordi W and Oracle Collaborative Group. Broad-  
2 spectrum antibiotics for spontaneous preterm labour: the ORACLE II  
3 randomised trial. ORACLE Collaborative Group. *Lancet* 2001;357(9261):989-  
4 94
- 5 5. Peaceman AM, Andrews WW, Thorp JM, et al. Fetal fibronectin as a predictor of  
6 preterm birth in patients with symptoms: a multicenter trial. *Am J Obstet*  
7 *Gynecol* 1997;177(1):13-8
- 8 6. Macintyre-Beon C, Skeoch C, Jackson L, Booth P, Cameron A. Scottish Perinatal  
9 Collaborative Transport Study. NHS Quality Improvement Scotland 2008
- 10 7. Wilson A, MacLean D, Skeoch C, Jackson L. An evaluation of the financial and  
11 emotional impact of in utero transfers upon families: a Scotland-wide audit.  
12 *Infant* 2010;6(2):38-40
- 13 8. Marlow N, Bennett C, Draper ES, Hennessy EM, Morgan AS, Costeloe KL.  
14 Perinatal outcomes for extremely preterm babies in relation to place of birth in  
15 England: the EPICure 2 study. *Arch Dis Child Fetal Neonatal Ed*  
16 2014;99(3):F181-8
- 17 9. Asztalos EV, Murphy KE, Willan AR, et al. Multiple Courses of Antenatal  
18 Corticosteroids for Preterm Birth Study: Outcomes in Children at 5 Years of  
19 Age (MACS-5). *JAMA Pediatr* 2013
- 20 10. de Heus R, Mol BW, Erwich JJ, et al. Adverse drug reactions to tocolytic  
21 treatment for preterm labour: prospective cohort study. *BMJ* 2009;338:b744
- 22 11. Yee WH, Sauve R. What information do parents want from the antenatal  
23 consultation? *Paediatr Child Health* 2007;12(3):191-6
- 24 12. Honest H, Forbes CA, Duree KH, et al. Screening to prevent spontaneous  
25 preterm birth: systematic reviews of accuracy and effectiveness literature with  
26 economic modelling. *Health Technol Assess* 2009;13(43):1-627
- 27 13. Deshpande SN, van Asselt AD, Tomini F, et al. Rapid fetal fibronectin testing to  
28 predict preterm birth in women with symptoms of premature labour: a

- 1  
2 1 systematic review and cost analysis. *Health Technol Assess* 2013;17(40):1-  
3  
4 2 138  
5  
6 3 14. Stock SJ, Morris RK, Chandiramani M et al. Variation in management of women  
7  
8 4 with threatened preterm labour. *Arch Dis Child Fetal Neonatal Ed*  
9  
10 5 2015;100(3):F276  
11  
12 6 15. Debray TP, Riley RD, Rovers MM, Reitsma JB, Moons KG, Cochrane IPDM-  
13  
14 7 aMg. Individual participant data (IPD) meta-analyses of diagnostic and  
15  
16 8 prognostic modeling studies: guidance on their use. *PLoS Med*  
17  
18 9 2015;12(10):e1001886  
19  
20 10 16. Debray TP, Moons KG, Ahmed I, Koffijberg H, Riley RD. A framework for  
21  
22 11 developing, implementing, and evaluating clinical prediction models in an  
23  
24 12 individual participant data meta-analysis. *Statistics in medicine*  
25  
26 13 2013;32(18):3158-80  
27  
28 14 17. Roberts D, Brown J, Medley N, Dalziel SR. Antenatal corticosteroids for  
29  
30 15 accelerating fetal lung maturation for women at risk of preterm birth.  
31  
32 16 *Cochrane Database Syst Rev* 2017;3:CD004454  
33  
34 17 18. Collins GS, Reitsma JB, Altman DG, Moons KG. Transparent reporting of a  
35  
36 18 multivariable prediction model for individual prognosis or diagnosis (TRIPOD):  
37  
38 19 the TRIPOD statement. *BMJ* 2015;350:g7594  
39  
40 20 19. Lu GC, Goldenberg RL, Cliver SP, Kreaden US, Andrews WW. Vaginal fetal  
41  
42 21 fibronectin levels and spontaneous preterm birth in symptomatic women.  
43  
44 22 *Obstet Gynecol* 2001;97(2):225-8  
45  
46 23 20. Gomez R, Romero R, Medina L, et al. Cervicovaginal fibronectin improves the  
47  
48 24 prediction of preterm delivery based on sonographic cervical length in patients  
49  
50 25 with preterm uterine contractions and intact membranes. *Am J Obstet*  
51  
52 26 *Gynecol* 2005;192(2):350-9  
53  
54 27 21. Abbott DH, NL. Seed, PT. Bennett, PR. Chandiramani, M. David, AL. Girling, J,  
55  
56 28 Norman, JE. Stock, SJ. Tribe, RM. Shennan, AH. EQUIPP: Evaluation of

- 1 Fetal Fibronectin with a novel bedside Quantitative Instrument for the  
2 Prediction of Preterm birth. Arch Dis Child Fetal Neonatal Ed 2014;99:A150-  
3 A51
- 4 22. Abbott DS, Radford SK, Seed PT, Tribe RM, Shennan AH. Evaluation of a  
5 quantitative fetal fibronectin test for spontaneous preterm birth in symptomatic  
6 women. Am J Obstet Gynecol 2013;208(2):122 e1-6
- 7 23. Bruijn MM, Kamphuis EI, Hoesli IM, et al. The predictive value of quantitative  
8 fibronectin testing in combination with cervical length measurement in  
9 symptomatic women. Am J Obstet Gynecol 2016;215(6):793 e1-93 e8
- 10 24. Bruijn M, Vis JY, Wilms FF, et al. Quantitative fetal fibronectin testing in  
11 combination with cervical length measurement in the prediction of  
12 spontaneous preterm delivery in symptomatic women. BJOG  
13 2016;123(12):1965-71
- 14 25. Whiting PF, Rutjes AW, Westwood ME, et al. QUADAS-2: a revised tool for the  
15 quality assessment of diagnostic accuracy studies. Ann Intern Med  
16 2011;155(8):529-36
- 17 26. Hayden JA, van der Windt DA, Cartwright JL, Cote P, Bombardier C. Assessing  
18 bias in studies of prognostic factors. Ann Intern Med 2013;158(4):280-6
- 19 27. Moons KG, de Groot JA, Bouwmeester W, et al. Critical appraisal and data  
20 extraction for systematic reviews of prediction modelling studies: the  
21 CHARMS checklist. PLoS Med 2014;11(10):e1001744
- 22 28. Vergouwe Y, Steyerberg EW, Eijkemans MJ, Habbema JD. Substantial effective  
23 sample sizes were required for external validation studies of predictive logistic  
24 regression models. J Clin Epidemiol 2005;58(5):475-83
- 25 29. Vittinghoff E, McCulloch CE. Relaxing the rule of ten events per variable in  
26 logistic and Cox regression. Am J Epidemiol 2007;165(6):710-8

- 1 30. Haas DM, Imperiale TF, Kirkpatrick PR, Klein RW, Zollinger TW, Golichowski  
2 AM. Tocolytic therapy: a meta-analysis and decision analysis. *Obstet Gynecol*  
3 2009;113(3):585-94  
4  
5 31. Steyerberg EW, Harrell FE, Jr., Borsboom GJ, Eijkemans MJ, Vergouwe Y,  
6 Habbema JD. Internal validation of predictive models: efficiency of some  
7 procedures for logistic regression analysis. *J Clin Epidemiol* 2001;54(8):774-  
8 81  
9  
10 32. National Institute for Clinical Excellence (NICE) Guide to the methods of  
11 technology appraisal 2013.  
12 <https://www.nice.org.uk/process/pmg9/chapter/the-reference-case> (accessed  
13 23<sup>rd</sup> November 2017).  
14  
15 33. <https://www.tommys.org> (accessed 23<sup>rd</sup> November 2017)  
16  
17

## 18 **Figure Legends**

### 19 **Figure 1**

20 Flow chart illustrating the design of QUIDS study and conceptual division into Part 1  
21 and Part 2  
22  
23  
24  
25  
26  
27  
28  
29  
30  
31  
32  
33  
34  
35  
36  
37  
38  
39  
40  
41  
42  
43  
44  
45  
46  
47  
48  
49  
50  
51  
52  
53  
54  
55  
56  
57  
58  
59  
60

Figure 1

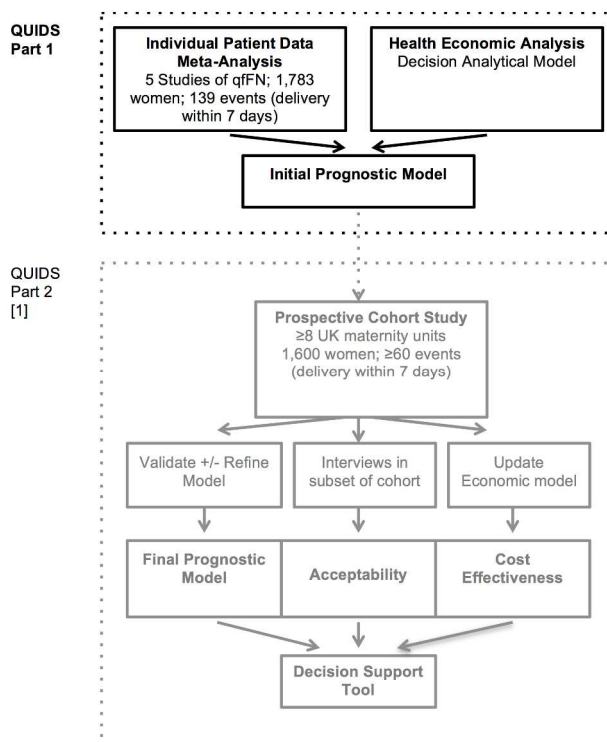

Flow chart illustrating the design of QUIDS study and conceptual division into Part 1 and Part 2

209x297mm (300 x 300 DPI)



1  
2  
3  
4  
5  
6  
7  
8  
9  
10  
11  
12  
13  
14  
15  
16  
17  
18  
19  
20  
21  
22  
23  
24  
25  
26  
27  
28  
29  
30  
31  
32  
33  
34  
35  
36  
37  
38  
39  
40  
41  
42  
43  
44  
45  
46  
47  
48  
49  
50  
51  
52  
53  
54  
55  
56  
57  
58  
59  
60

**QUIDS Qualitative**

Quantitative Fibronectin to help Decision-making in women with Symptoms of Preterm Labour:  
determining decisional requirements

**Protocol**

(October 2015)

White H, O'Brien E, Hodgetts-Moreton V, Stock S, Lavender T

## Background

Preterm birth, defined as birth prior to 37 weeks gestation, occurs in 6-7% of pregnancies in Europe<sup>1</sup> and was recorded as 5.78% in England in 2013/14, equating to over 37,000 births.<sup>2</sup> Preterm birth is associated with a high risk of mortality, wide-ranging short- and long-term morbidities,<sup>3,4</sup> and significant economic costs to the NHS compared with birth at term.<sup>5</sup> Reducing the detrimental impact of preterm birth relies on the provision of timely and appropriate perinatal interventions. However, accurate prediction of preterm birth is challenging, even when the clinical symptoms are suggestive of preterm labour. In randomised trials approximately 80% of women diagnosed with preterm labour remained pregnant after 7 days.<sup>6,7</sup>

Interventions in preterm labour and preparations for preterm birth may include administration of corticosteroids to accelerate fetal lung maturation<sup>8,9</sup> and magnesium sulphate for fetal neuroprotection,<sup>10</sup> in utero transfer to a facility with appropriate maternity and neonatal services, and tocolysis to optimise time before birth to enable these.<sup>11</sup> Whilst such interventions can improve outcomes for mothers and babies who do experience preterm birth, they are not necessarily benign, especially for those in whom preterm birth does not occur.

The maximal beneficial impact of corticosteroids occurs with administration between 48 hours and seven days before birth, thus timing is especially important in optimising benefit for the neonate. For women who remain at risk of preterm birth after seven days of the initial dose, repeated doses reduce respiratory distress in the neonate<sup>9</sup> but have been found to be associated with a dose-dependent reduction in birthweight.<sup>12,13</sup> A five-year follow-up study of women who received repeated doses of antenatal corticosteroids due to risk of preterm birth found an increased risk of neurodevelopment impairment in infants born at term.<sup>14</sup> Therefore developing a strategy to establish the optimal time to give steroids is a research priority.

1  
2  
3 Magnesium sulphate administration immediately prior to birth has been shown to reduce cerebral  
4 palsy,<sup>10</sup> but there is a risk of magnesium toxicity leading to respiratory depression in the mother and,  
5  
6 theoretically, the neonate.<sup>15</sup>  
7  
8  
9

10 Whilst there is no clear beneficial effect of tocolytics on the incidence or outcome of preterm birth,<sup>16</sup>  
11  
12 their use is recommended if the days gained prior to preterm birth can be used appropriately, for  
13  
14 example transfer to a suitable maternity unit or the administration of drugs to protect the  
15  
16 neonate.<sup>11</sup> Tocolysis is linked with various maternal and neonatal complications,<sup>17</sup> hence the need  
17  
18 for therapy targeted only for those at risk of preterm birth and close monitoring of the mother and  
19  
20 fetus throughout.  
21  
22  
23

24 Often, inpatient admission is recommended if preterm labour is suspected. Previous literature has  
25  
26 highlighted the social isolation and support needs that women with high-risk pregnancies who are  
27  
28 hospitalised experience.<sup>18</sup> In some cases, in-utero transfer is indicated to ensure that birth takes  
29  
30 place in a specialist unit with appropriate neonatal care facilities. This policy has been shown to  
31  
32 reduce mortality<sup>19,20</sup> and morbidity<sup>21</sup> in preterm neonates, especially those born very premature.  
33  
34 Qualitative research has indicated that women generally acknowledge the potential benefit of in  
35  
36 utero transfer to their baby and, hence, are willing to endure the inconvenience and upheaval that it  
37  
38 entails.<sup>22,23</sup> However, the experience is associated with an emotional, social and financial burden on  
39  
40 women and their families, especially for the substantial proportion of women who do not deliver  
41  
42 prematurely following in utero transfer. When describing their experiences of in utero transfer,  
43  
44 women expressed shock at the prospect of the transfer, feeling socially isolated, and having no  
45  
46 control over the situation, in addition to the practical difficulties experienced particularly by women  
47  
48 who already had children.<sup>22,24,25</sup> In a large survey of women who had experienced in utero transfer,  
49  
50 over a quarter lamented the financial cost<sup>24</sup> particularly with respect to their partner's outlay for  
51  
52 travel, food, accommodation, and phone bills, exacerbated with requiring time off work.<sup>22</sup>  
53  
54  
55  
56  
57

58 Furthermore, in utero transfer is costly to maternity services. Securing a maternal and neonatal bed  
59  
60

1  
2  
3 in another unit is a time-consuming task that often falls to delivery suite midwives to arrange, whilst  
4 also continuing to provide care to the woman.<sup>26</sup> In a large observational study of all in utero  
5 transfers that took place in Scotland in a six-month period, nearly one third of all transfers were due  
6 to threatened preterm labour.<sup>27</sup> Under half of the women transferred from one consultant-led unit  
7 to another gave birth within 48 hours.<sup>27</sup> Such unnecessary transfers are costly to women, their  
8 families and maternity services. Qualitative research into women's experiences of preterm labour  
9 have highlighted the need for caregivers to create an environment where women are enabled to  
10 discuss their fears<sup>28</sup> and exert control over how they manage their preterm labour care.<sup>25</sup>  
11  
12  
13  
14  
15  
16  
17  
18  
19  
20  
21  
22  
23  
24

25 Accurate prediction of preterm birth could reduce the burdens and risks associated with  
26 unnecessary interventions, and enable women and their clinicians to make informed decisions  
27 regarding their care. Numerous diagnostic tests have been used in preterm labour, including  
28 biochemical tests of vaginal secretions and cervical length.<sup>29</sup> One such test is fetal fibronectin, a  
29 near-bedside test that provides a positive or negative result and has excellent negative predictive  
30 value.<sup>30</sup> Thus fetal fibronectin can identify which women will not benefit and may be put at risk by  
31 the interventions described previously, and reduce costs to maternity services.<sup>31</sup> Developments in  
32 fetal fibronectin testing have led to a quantitative test that provides a concentration of fetal  
33 fibronectin in vaginal secretions, giving women and clinicians more information on which to base  
34 their management decisions.<sup>32</sup>  
35  
36  
37  
38  
39  
40  
41  
42  
43  
44  
45  
46  
47  
48  
49  
50

51 Qualitative evidence has indicated that women feel a sense of increased responsibility to their  
52 babies and themselves during a high risk pregnancy, such as threatened preterm labour.<sup>33</sup> Women  
53 want to be involved in decision making about their care to different degrees and feel most satisfied  
54 when their caregiver supports them to make decisions in the way they felt most comfortable.<sup>33</sup>  
55  
56  
57  
58  
59  
60

1  
2  
3 Previous literature on decision making and preterm birth has focussed on diagnostic tests<sup>6,28–32,34</sup> and  
4 the care of the preterm infant.<sup>35,36</sup> To date, there has been no investigation of what women, their  
5 partners and caregivers would like to know in order to make informed decisions about the care that  
6 is provided following the signs and symptoms of preterm labour.  
7  
8  
9  
10  
11  
12  
13  
14  
15

16 Funding has been received from the National Institute for Health Research Health Technology  
17 Assessment Programme for a large, multicentre trial to develop a mobile application decision  
18 support tool for the management of women with symptoms and signs of preterm labour, based on a  
19 validated model using quantitative fetal fibronectin testing. This study is the precursor to that trial,  
20 with the aim of determining the decisional needs of pregnant women with the symptoms and signs  
21 of preterm labour, their families and caregivers, using a qualitative framework approach. The  
22 outcomes of this qualitative study will inform the development of the mobile application decision  
23 support tool, using the findings from an individual patient data meta-analysis. The tool will then be  
24 externally validated and refined in the multi-centre trial, QUIDS.  
25  
26  
27  
28  
29  
30  
31  
32  
33  
34  
35  
36  
37  
38  
39  
40  
41  
42  
43  
44  
45  
46  
47  
48  
49  
50  
51  
52  
53  
54  
55  
56  
57  
58  
59  
60

## Methods

A qualitative framework approach will be used, based on data collected from focus groups and semi-structured telephone interviews.

## Setting

Focus groups will take place in three maternity units: Liverpool Women's NHS Foundation Trust, Birmingham Women's NHS Foundation Trust and Royal Edinburgh Hospital, NHS Lothian. There will be focus groups for women and a separate focus group for partners. Clinicians who care for women with threatened preterm birth will be interviewed by telephone.

## Sample

A purposive sample of women and partners will be recruited to cover a variety of experiences of preterm labour and birth. Women will be stratified by their prior experience and relevant characteristics, including ethnicity, previous obstetric history, living in an urban or rural setting and proximity to a tertiary neonatal referral centre. Two focus groups of 4–8 women will be conducted at each site; one for pregnant women who are at high risk of preterm birth, and one for postnatal women who have recently experienced preterm birth. One partners' focus group will be conducted at one of the sites. If women or partners are unable to attend a focus group but still wish to participate, a semi-structured telephone interview will be offered.

Up to 10 obstetricians, including trainees, midwives, and neonatologists will be purposefully recruited to cover a range of professional backgrounds and experience. Semi-structured telephone interviews will be used to collect the data.

## Eligibility

### *Principal inclusion criteria for women's antenatal focus groups*

Women who are currently pregnant who:

- Have previously experienced preterm birth following preterm labour,
- Have experienced threatened preterm labour in this pregnancy,
- Are at high risk of preterm birth for another clinical reason, such as prior cervical surgery.

### *Principal inclusion criteria for women's postnatal focus groups*

Women who have experienced preterm birth following preterm labour at <34 weeks whose babies **are stable and well** and are receiving care on the special care baby unit or neonatal intensive care unit.

### *Principal inclusion criteria for partners' focus groups*

Partners of women who fit the eligibility criteria for either focus group.

### *Principal exclusion criteria for the focus groups*

Non-English speaking individuals.

### *Principal inclusion criteria for clinician interviews*

Clinicians who care for pregnant women i.e. obstetricians (including trainees), neonatologists and midwives.

### *Principal exclusion criteria for clinician interviews*

1  
2  
3 Researchers in QUIDS or QUIDS qualitative.  
4  
5  
6  
7  
8

## 9 **Recruitment**

### 10 *Women and partners*

11  
12  
13  
14  
15 Eligible women will be identified by clinicians in the preterm birth clinic and other antenatal clinics,  
16  
17 and antenatal, triage or labour wards (for the antenatal focus groups) and the special care baby unit  
18  
19 or postnatal clinics (for the postnatal focus groups) at each site. Eligible partners will be identified by  
20  
21 the same method. Clinicians who are aware of and understand the research aims will approach  
22  
23 women and partners to request consent for a researcher to contact them. Importantly, only  
24  
25 postnatal parents whose babies are being cared for on the SCBU who are considered stable and well  
26  
27 by the clinicians will be approached. With consent the researcher will make contact to talk to the  
28  
29 women and/or their partners about the research, either face-to-face or over the telephone.  
30  
31

32  
33 Potential participants will be given the participant information sheet (PIS) (appendix \_) that is  
34  
35 relevant to them and given verbal information about the study. Each participant will be given time to  
36  
37 read the information and the opportunity to have any questions answered. Willing participants will  
38  
39 be asked to provide their written consent prior to the focus groups.  
40  
41  
42  
43  
44  
45

### 46 *Clinicians*

47  
48  
49 Eligible clinicians will be approached by the researchers, via email or face-to-face. Clinicians will be  
50  
51 given the clinician PIS (appendix \_) and the opportunity to read the information and have any  
52  
53 questions answered. Willing clinicians will be asked to provide their written consent prior to the  
54  
55 interviews.  
56  
57  
58  
59  
60



1  
2  
3 All participants (women, partners and clinicians) will be reassured that they are not compelled to  
4 participate, that they can withdraw from the study at any time, and that non-participation will not  
5 affect their care or employment in any way.  
6  
7  
8  
9

### 10 11 12 13 **Data collection**

14  
15  
16 The primary aim of this research is to determine the decisional requirements of women, their  
17 partners and clinicians for the management of preterm labour. Qualitative semi-structured  
18 interviews, in a focus-group setting or individual telephone interviews, provide a means of collecting  
19 rich, in-depth data with a specific focus.<sup>37</sup> Hence, structured topic guides will be used to initiate and  
20 concentrate the discussion (appendices 7–10).  
21  
22  
23  
24  
25  
26  
27

28  
29 Focus groups are the preferred format for eliciting the view of women and women's partners.

30  
31 Encouraging discussion among a homogenous group with a shared interest is likely to provide rich  
32 insight and understanding into the group's experiences, beliefs and norms as a result of their social  
33 interaction.<sup>38</sup> Conversely, interviewing clinicians individually avoids the potential pitfall of  
34 professional embarrassment stifling ideas in a group setting. Interviewing individual clinicians with a  
35 range of professional experience should ensure that the decisional requirements of clinicians at all  
36 levels of experience are understood.  
37  
38  
39  
40  
41  
42  
43  
44  
45  
46  
47

48  
49 Demographic details and baseline characteristics will be collected prior to the interviews, either as a  
50 self-completion questionnaire, or questions asked by the researcher over the telephone. All  
51 interviews will be audio recorded, with the participants' consent, and field notes taken. The focus  
52 groups will be facilitated by at least two researchers. This is to ensure that all pre-specified areas of  
53 interest are covered and that non-verbal communication and group interactions are documented  
54 within the field-notes, which will provide context for the data analysis. Recapping will be used to  
55  
56  
57  
58  
59  
60

clarify aspects and avoid misinterpretation. To enable all participants to talk freely, the researchers will be unknown to the participants and not working clinically in the unit where the interview is conducted. Clinicians will be interviewed by a researcher who is unknown to them.

|                                  | Site       | Interviewers |
|----------------------------------|------------|--------------|
| Women and partners' focus groups | Liverpool  | HW and EO    |
|                                  | Birmingham | HW and VH-M  |
|                                  | Edinburgh  | HW and LM    |
| Clinician interviews             | Telephone  | HW (and EO?) |

### Analysis plan

A framework approach to data analysis will be used. This approach was developed to manage and interpret large volumes of data collected to inform health policy, meaning they had focussed aims and objectives.<sup>37</sup> Likewise, this research has clear aims, as described previously, in addition to the methodological aim of collecting rich data about the experiences and beliefs of women, their partners and clinicians in relation to managing preterm labour.

Framework analysis follows specific, clearly documented stages of analysis that are transparent so that others can review the interpretation processes and understand how the findings were reached.<sup>39</sup> Transparency is particularly important in this study as the findings will inform the development of an application to aid management decisions in clinical practice. Following verbatim transcription of the interview recordings, the researchers will become familiar with the data by reading the transcripts and field-notes several times. The next stage is to develop a theoretical framework by re-reading the transcripts and making notes as recurring characteristics are

V 1.3  
21/10/15

1  
2  
3 recognised. The characteristics will then be collated into themes, which are based on the text itself,  
4 supported by the field-notes. The resulting thematic framework will be applied back to the  
5 transcripts and field-notes to check that it reflects the context of the original data. The transcripts  
6 will be coded, so that portions of text are linked to a discrete theme. A sample of transcripts will be  
7 independently coded by two people. The data will be charted and indexed to identify the preterm  
8 labour or professional experience of the participant, thus enabling the attribution of themes to a  
9 particular group. Finally, the content of the charts will be interpreted and mapped against each  
10 other to devise themes and sub-themes categories. Once again, this will involve review of the  
11 original data. Explanatory accounts will be developed to clarify the data and quotable sections of  
12 data will be identified. The final categories will be discussed between the researchers until  
13 consensus is met. The researchers will maintain reflexive journals throughout the data collection and  
14 analysis stages, recognising and ameliorating, as far as possible, the fact that their presence and  
15 assumptions impact on the data and the findings.<sup>40</sup>

16  
17 This method of data analysis creates a clear audit trail thus ensuring rigour. Each stage of analysis  
18 refers back to the original data so that context and meaning is not lost in the final framework of  
19 themes and subthemes. The data analysis process will be managed using NVivo software, a  
20 qualitative data analysis tool.

### 21 22 23 24 25 26 27 28 29 30 31 32 33 34 35 36 37 38 39 40 41 42 43 44 45 46 **Participant withdrawal**

47  
48  
49 Participants may withdraw from the study at any point. However, they will not be able to withdraw  
50 use of their data once the prognostic tool is developed.  
51  
52  
53  
54  
55  
56  
57  
58  
59  
60

## Safety

The physical safety of participants will be ensured through adhering to the health and safety policies of the host units where the focus groups take place.

The emotional wellbeing of the participants will be safeguarded by following the Distress Policy (see appendix 11). The Supervisors of Midwives (SOM) team in each unit will be informed of the study and women and their partners will be given the SOM team contact details, should they become distressed or upset as a result of talking about their experiences. Participants will also be given the contact details for accessing local counselling services.

## Good clinical practice

### *Informed consent*

All participants will be fully informed about the study and the subsequent QUIDS trial via verbal and written communication. All eligible individuals will be given the participant information sheet (appendix \_\_) and provided with an opportunity to have any questions answered. Written consent will then be gained prior to the commencement of the focus groups/interviews.

### *Confidentiality*

Demographic information will be collected from participants to attribute themes from the data to particular groups within the analysis and dissemination of findings. Demographic information, which will contain potentially identifiable information, will be kept in a secure lockable cabinet. Audio recordings will be stored on an encryptable audio device only until they are transcribed. Once transcribed the audio recordings will be deleted. Transcription services are provided by '1<sup>st</sup> Class Secretarial', who subscribe to the Data Protection Act and have also signed the Code of Practice on Data Handling. Hard copies of audio transcripts and field-notes will be kept in a separate secure

1  
2  
3 lockable cabinet to the demographic information. The transcripts and field-notes will be coded to  
4  
5 identify which participant provided that data; the codes will only be known by the researchers.

6  
7 Participant's data will not be used for any purpose other than this study and the subsequent QUIDS  
8  
9 trial.

### 10 11 12 *Data Protection*

13  
14  
15  
16 Participants will be informed that publications from this study will contain direct quotes from the  
17  
18 focus groups/interviews and categorisation of their experience of preterm labour (e.g. experienced  
19  
20 preterm birth), which could enable personal identification.

21  
22  
23 All researchers involved in this study must comply with the requirements of the Data Protection Act  
24  
25 1998 with regard to the collection, storage, processing and disclosure of personal information and  
26  
27 uphold the Act's core principles. All computers used for processing data are password protected and  
28  
29 subject to the strict data protection policies of the researcher's institution.

### 30 31 32 *Good clinical practice training*

33  
34  
35 All researchers involved in this study must hold evidence of recent Good Clinical Practice training.  
36  
37  
38  
39  
40  
41

### 42 **Additional ethical considerations**

#### 43 44 45 *Expenses and reimbursement*

46  
47  
48 Participants will be reimbursed for all out of pocket expenses, for example travelling to the interview  
49  
50 site. Participants will be informed of this and how to apply for expenses reimbursement, including  
51  
52 keeping receipts for travel.  
53  
54  
55  
56  
57  
58  
59  
60

### *Safety of researchers*

An individualised risk assessment will be conducted to identify any risks to researchers or participants involved in this study. The lone working policy of the institution will be adhered to at all times. The only anticipated lone working will be during travel to and from the interview sites.

The lone working policy of the researcher's institutions mandates that researchers wear a GPS tracking and audio transmitting device during all lone-working, off-site research activity with participants. Participants will be informed if this device is being used.

### **Insurance / Indemnity**

The researcher's institution holds public liability insurance and professional indemnity insurance (appendices 12, 13 and 14).

### **Timeline**

The anticipated start date for the focus groups and interviews is 1<sup>st</sup> January 2016, to be completed within 3 months.

1  
2  
3 **Appendices**  
4

5  
6 **Appendix 1: PIS women**  
7

8  
9 **Appendix 2: PIS partners**  
10

11  
12 **Appendix 3: PIS clinicians**  
13

14  
15 **Appendix 4: Consent form women**  
16

17  
18 **Appendix 5: consent form partners**  
19

20  
21 **Appendix 6: consent form clinicians**  
22

23  
24 **Appendix 7: Interview schedule AN women**  
25

26  
27 **Appendix 8: Interview schedule PN women**  
28

29  
30 **Appendix 9: Interview schedule partners**  
31

32  
33 **Appendix 10: Interview schedule clinicians**  
34  
35  
36  
37  
38  
39  
40  
41  
42  
43  
44  
45  
46  
47  
48  
49  
50  
51  
52  
53  
54  
55  
56  
57  
58  
59  
60

For peer review only

## Appendix 11: Distress policy

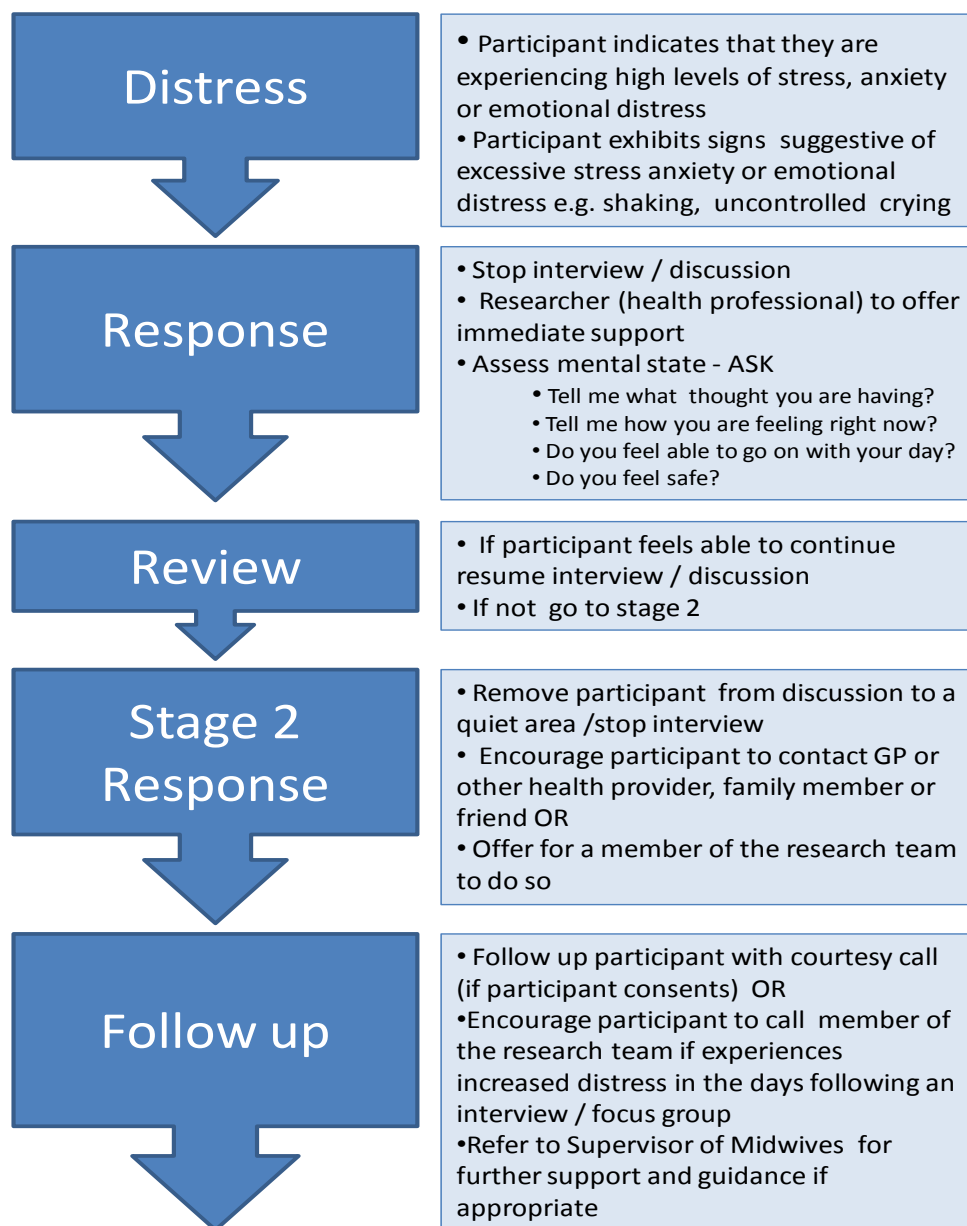

Adapted from Haigh and Witham (2010)<sup>41</sup>



1  
2  
3 **Appendix 12: Public Liability insurance**  
4  
5  
6  
7  
8  
9  
10  
11  
12  
13  
14  
15  
16  
17  
18  
19  
20  
21  
22  
23  
24  
25  
26  
27  
28  
29  
30  
31  
32  
33  
34  
35  
36  
37  
38  
39  
40  
41  
42  
43  
44  
45  
46  
47  
48  
49  
50  
51  
52  
53  
54  
55  
56  
57  
58  
59  
60

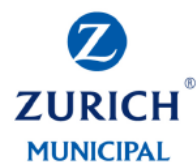

To Whom It May Concern

Our ref: SP/IND

3 June, 2015

Zurich Municipal Customer: The University of Manchester

This is to confirm that The University of Manchester have in force with this Company Public Liability Insurance until the policy expiry on 31 May 2016:

**Policy Number:** NHE-07CA03-0013

**Limit of Indemnity:** £ 50,000,000 any one claim

**Excess:** Nil any one claim

Zurich Municipal  
Zurich House  
2 Gladiator Way  
Farnborough  
Hampshire  
GU14 6GB

Telephone 0870 2418050  
Direct Phone 01252 387859  
Direct Fax 01252 375893  
E-mail alison.cliff@uk.zurich.com

Communications will be monitored regularly to improve our service and for security and regulatory purposes

Zurich Municipal is a trading name of Zurich Insurance Group Ltd

A public limited company incorporated in Ireland. Registration No. 13460  
Registered Office: Zurich House, Ballsbridge Park, Dublin 4, Ireland.

UK branch registered in England and Wales  
Registration No. BR7985.  
UK Branch Head Office: The Zurich Centre,  
3000 Parkway, Whiteley, Fareham, Hampshire  
PO15 7JZ

Authorised by the Central Bank of Ireland and subject to limited regulation by the Financial Conduct Authority. Details about the extent of our regulation by the Financial Conduct Authority are available from us on request.

Yours faithfully

A handwritten signature in black ink, appearing to read 'Nigel Smith'.

Underwriting Services  
Zurich Municipal  
Farnborough

## Appendix 13: Employers' Liability insurance

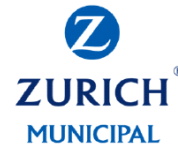

### Certificate of Employers' Liability Insurance(a)

(Where required by regulation 5 of the Employers' Liability (Compulsory Insurance) Regulations 2008 (the Regulations), a copy of this certificate must be displayed at all places where you employ persons covered by the policy or an electronic copy of the certificate must be retained and be reasonably accessible to each employee to whom it relates).

|                                             |                              |
|---------------------------------------------|------------------------------|
| Policy No.                                  | NHE-07CA03-0013              |
| 1. Name of policyholder                     | The University of Manchester |
| 2. Date of commencement of insurance policy | 01 June 2015                 |
| 3. Date of expiry of insurance policy       | 31 May 2016                  |

We hereby certify that subject to paragraph 2:

- The policy to which this certificate relates satisfies the requirements of the relevant law applicable in Great Britain, Northern Ireland, the Isle of Man, the Island of Jersey, the Island of Guernsey and the Island of Alderney (b)
- (a) the minimum amount of cover provided by this policy is no less than £5 million (c)

Signed on behalf of Zurich Insurance plc (Authorised Insurer).

Signature

Stephen Lewis

Chief Executive Officer, Zurich Insurance plc (UK Branch)

Zurich Municipal is a trading name of Zurich Insurance plc  
A public limited company incorporated in Ireland  
Registration No. 13460 Registered Office Zurich House, Ballsbridge Park, Dublin 4 Ireland.  
UK branch registered in England and Wales Registration No. BR 7985  
UK Branch Head Office  
The Zurich Centre, 3000 Parkway, Whiteley, Fareham, Hampshire PO15 7TZ

### Notes

- Where the employer is a company to which regulation 3(2) of the Regulations applies, the certificate shall state in a prominent place, either that the policy covers the holding company and all its subsidiaries, or that the policy covers the holding company and all its subsidiaries except any specifically excluded by name, or that the policy covers the holding company and only the named subsidiaries.
- Specify applicable law as provided for in regulation 4(6) of the Regulations.
- See regulation 3(1) of the Regulations and delete whichever of paragraphs 2(a) or 2(b) does not apply. Where 2(b) is applicable, specify the amount of cover provided by the relevant policy

Authorised by the Central Bank of Ireland and subject to limited regulation by the Financial Conduct Authority. Details about the extent of our regulation by the Financial Conduct Authority are available from us on request

1  
2  
3 **Appendix 14: Professional indemnity insurance**  
4  
5  
6  
7  
8

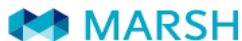

Cliffe Crowther  
Marsh Ltd  
Belvedere  
12 Booth Street  
Manchester  
M2 4AW  
+44 (0) 161 954 7317  
Fax +44 (0) 161 954 7210  
Cliffe.crowther@marsh.com  
www.marsh.com

11  
12  
13  
14  
15  
16 **To whom it may concern**  
17  
18  
19  
20  
21

22 29<sup>th</sup> May 2015  
23  
24  
25

26 Dear Sirs,  
27

28 **CONFIRMATION OF INSURANCE – The University of Manchester and Subsidiary  
29 Companies**

30 As requested by the above client, we are writing to confirm that we act as Insurance Brokers to  
31 the client and that we have arranged insurance(s) on its behalf as detailed below:  
32

33 **PROFESSIONAL INDEMNITY INSURANCE**

|                     |                                                                                                    |
|---------------------|----------------------------------------------------------------------------------------------------|
| INSURERS            | Novae Underwriting Ltd.                                                                            |
| POLICY NUMBER       | 003210MMA15C                                                                                       |
| PERIOD OF INSURANCE | 01 June 2015 to 31 <sup>st</sup> May 2016, both dates inclusive.                                   |
| LIMIT OF INDEMNITY  | GBP10,000,000 any one claim and in the aggregate any one insurance period plus costs and expenses. |
| DEDUCTIBLE          | GBP20,000 each & every claim including costs and expenses                                          |

34  
35  
36  
37  
38  
39  
40  
41  
42  
43  
44  
45  
46  
47  
48  
49  
50  
51  
52  
53

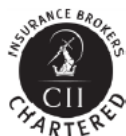

55 Registered in England Number: 1507274, Registered Office:  
56 1 Tower Place West, Tower Place, London EC3R 5BU.  
57 Marsh Ltd is authorised and regulated by the Financial Conduct  
58 Authority

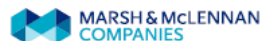

60  
V 1.3  
21/10/15

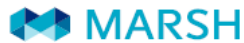

Page 2  
29<sup>th</sup> of May 2015

We have placed the insurance which is the subject of this letter after consultation with the client and based upon the client's instructions only. Terms of coverage, including limits and deductibles, are based upon information furnished to us by the client, which information we have not independently verified.

This letter is issued as a matter of information only and confers no right upon you other than those provided by the policy. This letter does not amend, extend or alter the coverage afforded by the policies described herein. Notwithstanding any requirement, term or condition of any contract or other document with respect to which this letter may be issued or pertain, the insurance afforded by the policy (policies) described herein is subject to all terms, conditions, limitations, exclusions and cancellation provisions and may also be subject to warranties. Limits shown may have been reduced by paid claims.

We express no view and assume no liability with respect to the solvency or future ability to pay of any of the insurance companies which have issued the insurance(s).

We assume no obligation to advise yourselves of any developments regarding the insurance(s) subsequent to the date hereof. This letter is given on the condition that you forever waive any liability against us based upon the placement of the insurance(s) and/or the statements made herein with the exception only of wilful default, recklessness or fraud.

This letter may not be reproduced by you or used for any other purpose without our prior written consent.

This letter shall be governed by and shall be construed in accordance with English law.

Yours faithfully

Cliffe Crowther

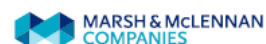

## References

1. Beck S, Wojdyla D, Say L, *et al*. The worldwide incidence of preterm birth: a systematic review of maternal mortality and morbidity. *Bull World Health Organ* 2010;88:31–38. doi:10.2471/BLT.08.062554.
2. Health and Social Care Information Centre. *Hospital Episode Statistics: NHS Maternity statistics — England, 2013–14*. Leeds, HSIC.
3. Saigal S, Doyle LW. An overview of mortality and sequelae of preterm birth from infancy to adulthood. *Lancet* 2008;371:261–9.
4. D’Onofrio BM, Class QA, Rickert ME, *et al*. Preterm birth and mortality and morbidity: a population-based quasi-experimental study. *JAMA Psychiatry* 2013; 70(11):1231-1240. doi:10.1001/jamapsychiatry.2013.2107 .
5. Mangham LJ, Petrou S, Doyle LW, *et al*. The cost of preterm birth throughout childhood in England and Wales. *Pediatrics* 2009;123(2):e312–27. doi: 10.1542/peds.2008-1827.
6. Alfirevic Z, Allen-Coward H, Molina F, *et al*. Targeted therapy for threatened preterm labor based on sonographic measurement of the cervical length: a randomized controlled trial. *Ultrasound Obstet Gynecol* 2007;29:47–50. DOI: 10.1002/uog.3908.
7. Salim R, Garmi G, Nachum Z, *et al*. Nifedipine compared with atosiban for treating preterm labor: a randomized controlled trial. *Obstet Gynecol* 2012;120:1323–31. DOI:10.1097/AOG.0b013e3182755dff
8. Roberts D, Dalziel SR. Antenatal corticosteroids for accelerating fetal lung maturation for women at risk of preterm birth. *Cochrane Database of Systematic Reviews* 2006, Issue 3. Art. No.: CD004454. DOI: 10.1002/14651858.CD004454.pub2.
9. Crowther CA, McKinlay CJD, Middleton P, Harding JE. Repeat doses of prenatal corticosteroids for women at risk of preterm birth for improving neonatal health outcomes.

- 1  
2  
3  
4  
5  
6  
7  
8  
9  
10  
11  
12  
13  
14  
15  
16  
17  
18  
19  
20  
21  
22  
23  
24  
25  
26  
27  
28  
29  
30  
31  
32  
33  
34  
35  
36  
37  
38  
39  
40  
41  
42  
43  
44  
45  
46  
47  
48  
49  
50  
51  
52  
53  
54  
55  
56  
57  
58  
59  
60
- Cochrane Database of Systematic Reviews* 2015, Issue 7. Art. No.: CD003935. DOI: 10.1002/14651858.CD003935.pub4.
10. Doyle LW, Crowther CA, Middleton P, Marret S, Rouse D. Magnesium sulphate for women at risk of preterm birth for neuroprotection of the fetus. *Cochrane Database of Systematic Reviews* 2009, Issue 1. Art. No.: CD004661. DOI:10.1002/14651858.CD004661.pub3.
11. Royal College of Obstetricians and Gynaecologists. *Tocolysis for women in preterm labour: Green-top Guideline No. 1b*. 2011. London: RCOG.
12. Murphy KE, Hannah ME, Willan AR, Hewson SA, Ohlsson A, Kelly EN, Matthews SG, Saigal S, Asztalos E, Ross S, Delisle M-F, Amankwah K, Guselle P, Gafni A, Lee SK, Armson BA, for the MACS Collaborative Group. Multiple courses of antenatal corticosteroids for preterm birth (MACS): a randomised controlled trial. *Lancet* 2008; 372: 2143–51.
13. Norberg H, Stålnacke J, Diaz Heijtz R, Smedler A-C, Nyman M, Forssberg H, Norman M. Antenatal corticosteroids for preterm birth: dose-dependent reduction in birthweight, length and head circumference. *Acta Paediatrica* 2011;100:364–9.
14. Asztalos E, Willan A, Murphy K, Matthews S, Ohlsson A, Saigal S, Armson A, Kelly E, Delisle M-F, Gafni A, Lee S, Sananes R, Rovet J, Guselle P, Amankwah K, for the MACS-5 Collaborative Group. Association between gestational age at birth, antenatal corticosteroids, and outcomes at 5 years: multiple courses of antenatal corticosteroids for preterm birth study at 5 years of age (MACS-5). *BMC Pregnancy and Childbirth* 2014; 14:272.
15. Jacquemyn Y, Zecic A, Van Laere D, Roelens K. The use of intravenous magnesium in non-preeclamptic pregnant women: fetal/neonatal neuroprotection. *Arch Gynecol Obstet* 2015;291:969–975.
16. Gyetvai K, Hannah ME, Ellen D, Hodnett ED, Ohlsson A. Tocolytics for preterm labour: a systematic review. *Obstetrics and Gynecology* 1999;94(5):869–77.
17. Hill WC. Risks and complications of tocolysis. *Clinical Obstetrics and Gynecology* 1995;38(4):725–45.

- 1  
2  
3 18. Kent RA, Yazbek M, Heyns T, et al. The support needs of high-risk antenatal patients in  
4 prolonged hospitalisation. *Midwifery* 2015;31:164–9.  
5  
6  
7  
8 19. Lasswell SM, Barfield WD, Rochat RW, Blackmon L. Perinatal Regionalization for Very Low-  
9 Birth-Weight and Very Preterm Infants: A Meta-analysis. *JAMA*. 2010;304(9):992-1000.  
10 doi:10.1001/jama.2010.1226.  
11  
12  
13  
14 20. Marlow N, Bennett C, Drasper ES, Hennessy EM, Morgan AS, Costeloe KL. Perinatal  
15 outcomes for extremely preterm babies in relation to place of birth in England: The EPICure  
16 2 study. *Arch Dis Child Fetal Neonatal Ed* 2014;99:F181–88.  
17  
18  
19  
20 21. Towers TV, Bonebrake R, Padilla G, Rumney P. The effect of transport on the rate of severe  
21 intraventricular hemorrhage in very low birth weight infants. *Obstetrics and Gynecology*  
22 2000;95(2):291–295.  
23  
24  
25  
26 22. Porcellato L, Masson G, O’Mahony F, Jenkinson S, Vanner T, Cheshire K, Perkins E. ‘It’s  
27 something you have to put up with’— service users’ experiences of in utero transfer: a  
28 qualitative study. *BJOG* 2015; DOI: 10.1111/1471-0528.13235.  
29  
30  
31  
32 23. Bond PA, Crisp AS, Morgan MEI, Lobb MO, Cooke RWI. Maternal attitudes to transfer before  
33 delivery. *Journal of Reproductive and Infant Psychology* 1984;2(1):33–41. DOI:  
34 10.1080/02646838408403447.  
35  
36  
37  
38 24. Wilson AM, MacLean D, Skeoch CH, Jackson L. An evaluation of the financial and emotional  
39 impact of *in utero* transfers upon families: a Scotland-wide audit. *Infant* 2010;6(2):38–40.  
40  
41  
42  
43 25. Coster-Schulz MA, Mackey MC. The preterm labour experience: a balancing act. *Clinical*  
44 *Nursing Research* 1998;335–59.  
45  
46  
47  
48 26. Gale C, Hay A, Phillip C, et al. In-utero transfer is too difficult: results from a prospective  
49 study. *Early Human Development* 2012;88:147–50.  
50  
51  
52  
53 27. Macintyre-Beon C, Skeoch C, Jackson J, Booth P, Cameron A. *Perinatal Collaborative*  
54 *Transport Study: Final report*. 2008. Glasgow: Scottish Neonatal Transport Service.  
55  
56  
57  
58  
59  
60

- 1  
2  
3 28. O'Brien ET, Quenby S, Lavender T. Women's view of high risk pregnancy under threat of  
4 preterm birth. *Sexual and Reproductive Health* 2010;1:79–84.  
5  
6  
7  
8 29. Hezelgrave NL, Shennan AH, David AL. Tests to predict imminent delivery in threatened  
9 preterm labour. *BMJ* 2015;350:h2183 doi: 10.1136/bmj.h2183.  
10  
11  
12 30. Chandiramani M, Di Renzo GC, Gottschalk E, Helmer H, Henrich W, Hoesli I, Mol B, Norman  
13 JE, Robson S, Thornton S, Shennan A. Fetal fibronectin as a predictor of spontaneous  
14 preterm birth: a European perspective. *The Journal of Maternal-Fetal & Neonatal Medicine*  
15 2011;24(2):330–336.  
16  
17  
18 31. Deshpande SN, van Asselt ADI, Tomini F, Armstrong N, Allen A, Noake C, et al. Rapid fetal  
19 fibronectin testing to predict preterm birth in women with symptoms of premature labour: a  
20 systematic review and cost analysis. *Health Technol Assess* 2013;17(40).  
21  
22  
23 32. Radford S, Abbott D, Seed P, Kemp J, Shennan. Quantitative fetal fibronectin for the  
24 prediction of preterm birth in symptomatic women. *Arch Dis Child Fetal Neonatal Ed*  
25 2012;97(Suppl 1):A1–A125.  
26  
27  
28 33. Harrison MJ, Kushner KE, Benzies K, et al. Women's satisfaction with their involvement in  
29 health care decisions during a high-risk pregnancy. *Birth* 2003;30(2):109–15.  
30  
31  
32 34. Hill JL, Campbell MK, Zou GY, et al. Prediction of preterm birth in symptomatic women using  
33 decision tree modelling for biomarkers. *Am J Obstet Gynecol* 2008;198:468.e1-468.e9.  
34  
35  
36 35. Gallagher K, Martin J, Keller M, et al. European variation in decision-making and parental  
37 involvement during preterm birth. *Arch Dis Child Fetal Neonatal Ed* 2014;99:F245–9.  
38  
39  
40 36. Peerzada JM, Schollin J, Håkansson S. Delivery room decision-making for extremely preterm  
41 infants in Sweden. *Pediatrics* 2006;117(6):1988–95.  
42  
43  
44 37. Smith J, Firth J. Qualitative data analysis: the framework approach. *Nurse Researcher*  
45 2011;18(2):52–62.  
46  
47  
48 38. Rabiee F. Focus group interview and data analysis. *Proceedings of the Nutrition Society*  
49 2004;63: 655–660.  
50  
51  
52  
53  
54  
55  
56  
57  
58  
59  
60



- 1  
2  
3 39. Furber C. Framework analysis: a method for analysing qualitative data. *African Journal of*  
4  
5 *Midwifery and Women's Health* 2010;4(2):97–100.  
6  
7  
8 40. Sword W. Accounting for presence of self: reflections on doing qualitative research.  
9  
10 *Qualitative Health Research* 1999;9(2):270–8.  
11  
12 41. Haigh C, Witham G. *Distress protocol for qualitative data collection*. 2015. [Online] available  
13  
14 at:  
15  
16 [http://www2.mmu.ac.uk/media/mmuacuk/content/documents/rke/Advisory%20Distress%2](http://www2.mmu.ac.uk/media/mmuacuk/content/documents/rke/Advisory%20Distress%20Protocol.pdf)  
17  
18 [0Protocol.pdf](http://www2.mmu.ac.uk/media/mmuacuk/content/documents/rke/Advisory%20Distress%20Protocol.pdf) accessed October 2015.  
19  
20  
21  
22  
23  
24  
25  
26  
27  
28  
29  
30  
31  
32  
33  
34  
35  
36  
37  
38  
39  
40  
41  
42  
43  
44  
45  
46  
47  
48  
49  
50  
51  
52  
53  
54  
55  
56  
57  
58  
59  
60
